# Supplementary material for: Antiviral protection in the Pacific oyster Crassostrea (Magallana) gigas against OsHV-1 infection using UV-inactivated virus
Source: Frontiers journal article supplement (doi:10.3389/fmars.2024.1378511), 2024-04-23
Supplement: Table_1.DOCX [file Table_1.DOCX]

## Supplementary Table 1. List of primers used for oyster gene and virus gene expression analysis

| **Name** | **Organism** | **GenbankAN** | **sequence** | | **Function** | **Efficiency** | **Reference** |
| --- | --- | --- | --- | --- | --- | --- | --- |
| *Cg*-EF1 | oyster | AB122066 | forward | GAGCGTGAACGTGGTATCAC | housekeeping | 2,1 | de Lorgeril et al., 2018 (3) |
|  |  |  | reverse | ACAGCACAGTCAGCCTGTGA |  |  |
| *Cg*-RPL40 | oyster | FP004478 | forward | AATCTTGCACCGTCATGCAG | housekeeping | 2,0 | de Lorgeril et al., 2018 (3) |
|  |  |  | reverse | AATCAATCTCTGCTGATCTG |  |  |
| viperin | oyster | EKC28205 | forward | TAAATGCGGCTTCTGTTTCC | IFN pathway | 1,9 | Lafont et al., 2020 (27) |
|  |  | CGI_10018396 | reverse | CAGCTGAAGGTCCTCTTTGC |  |  |
| RLR | oyster | EKC34573 | forward | CCGGAAGTATGCTAGAGGAAGA G | IFN pathway | 1,9 | Lafont et al., 2020 (27) |
|  |  | CGI_10010459 | reverse | TCCGGTGTAGTTGTAGGTGATG |  |  |
| ADAR1 | oyster | EKC20855 | forward | CTCAAACAGTGCAACTGCATC | IFN pathway | 2,0 | Lafont et al., 2020 (27) |
|  |  | CGI_10005182 | reverse | TCACAAGCCCTGCTATCAC |  |  |
| IRF2 | oyster | EKC43155 | forward | CGAAACGCAGAAACTGTTC | IFN pathway | 2,0 | Lafont et al., 2020 (27) |
|  |  | CGI_10021170 | reverse | ATTTGCCTTCCATCTTTTGG |  |  |
| MyD88 | oyster | DQ530619.1 | forward | CGTGCCATGGACGGATAACAACG | NF-kB pathway | 1,8 | Lafont et al., 2020 (27) |
|  |  |  | reverse | GGCCCAGCAGTACCTCTGTGGAATC |  |  |
| ATG8 | oyster | EKC40439.1 | forward | CCGATGCTTGACAAGACCAA G | autophagy | 2,0 | Picot et al., 2020 (38) |
|  |  | CGI_10021322 | reverse | CCGTCCTCGTCTTTCTCCTG |  |  |
| Beclin | oyster | EKC28450.1 | forward | AAATGCTGCTTGGGGTCAG | autophagy | 2,0 | Picot et al., 2020 (38) |
|  |  | CGI_10027731 | reverse | CGGAATCCACCAGACCCATA |  |  |
| IAP18 | oyster | JH818926 | forward | CCCGAAAACGTAACCTCAGA | apoptosis | 2,0 | Segarra et al., 2014 (39) |
|  |  | [XP_019922715](https://www.ncbi.nlm.nih.gov/protein/XP_019922715.1) | reverse | TTTCGTTTGCTGCTCATTTG |  |  |
| ORF80 | OsHV-1µVar | YP_024619.1 | forward | AAGAGGATTTGGGTGCACAG | Membrane protein | 2,0 | Morga et al., 2017 (40) |
|  |  |  | reverse | TTGCATCCCAGGATTATCAG |  |  |
| ORF87 | OsHV-1µVar | YP_024626.1 | forward | CACAGACGACATTTCCCCAAA | Apoptosis inhibitor | 2,0 | Morga et al., 2017 (40) |
|  |  |  | reverse | AAAGCTCGTTCCCACATTGGT |  |  |
| ORF99 | OsHV-1µVar | YP_024638.1 | forward | GGTGGAGGTGGCTGTTGAAA | Apoptosis inhibitor | 2,0 | Morga et al., 2017 (40) |
|  |  |  | reverse | CCGACTGACAACCCATGGAC |  |  |
