# Supplementary material for: Antiviral protection in the Pacific oyster Crassostrea (Magallana) gigas against OsHV-1 infection using UV-inactivated virus
Source: Frontiers journal article supplement (doi:10.3389/fmars.2024.1378511), 2024-04-23
Supplement: Table_2.XLSX [file Table_2.XLSX]

## Sheet: qPCR data
sampling				raw qPCR data (ratio Cp Target/CpRef)
Exposition	Challenge	Timing	time point	viperin	RLR	ADAR	IRF2	MyD88	ATG8	Beclin	IAP18
no treatment	no challenge	T0 before priming	T0	0.000257	0.000225	0.000735	0.000734	0.000484	0.00143	0.00327	0.0018
no treatment	no challenge	T0 before priming	T0	0.00385	0.0182	0.00104	0.00108	0.0011	0.00281	0.00611	0.00294
no treatment	no challenge	T0 before priming	T0	0.0036	0.00166	0.00138	0.00118	0.00109	0.00219	0.00625	0.00277
no treatment	no challenge	T0 before priming	T0	0.00168	0.00947	0.00131	0.000622	0.000427	0.00145	0.00813	0.00511
no treatment	no challenge	T0 before priming	T0	0.00564	0.0202	0.00113	0.00136	0.000875	0.00314	0.00632	0.00563
no treatment	no challenge	T0 before priming	T0	0.00217	0.00739	0.00105	0.00247	0.000539	0.00192	0.00966	0.00383
no treatment	no challenge	T0 before priming	T0	0.00202	0.00543	0.000861	0.00435	0.00036	0.00145	0.0125	0.00322
no treatment	no challenge	T0 before priming	T0	0.000739	0.00702	0.000943	0.000202	0.000734	0.00165	0.00831	0.00117
no treatment	no challenge	T0 before priming	T0	0.00063	0.00353	0.00164	0	0.000304	0.00158	0.00452	0.000919
no treatment	no challenge	T0 before priming	T0	0.00243	0.00754	0.00113	0.00111	0.000744	0.00172	0.00652	0.00284
virus UV	no challenge	T24 post-priming/ T0 challenge	T1	0.0159	0.00592	0.000213	0.00365	0.00878	0.000291	0.000991	0.00214
virus UV	no challenge	T24 post-priming/ T0 challenge	T1	0.0174	0.00638	0.000289	0.00634	0.0125	0.000117	0.00056	0.00259
virus UV	no challenge	T24 post-priming/ T0 challenge	T1	0.000463	0.00658	0.000426	0.000303	0.0129	0.00017	0.00162	0.000819
virus UV	no challenge	T24 post-priming/ T0 challenge	T1	0.019	0.00214	0.00049	0.00531	0.0131	0.000265	0.000831	0.00104
virus UV	no challenge	T24 post-priming/ T0 challenge	T1	0.0057	0.00712	0.000282	0.00284	0.00746	0.000143	0.000454	0.00107
virus UV	no challenge	T24 post-priming/ T0 challenge	T1	0.0049	0.00961	0.000483	0.00411	0.00711	0.000301	0.00129	0.00141
virus UV	no challenge	T24 post-priming/ T0 challenge	T1	0.0101	0.00134	0.000323	0.00519	0.0078	0.000313	0.00104	0.000638
virus UV	no challenge	T24 post-priming/ T0 challenge	T1	0.00953	0.00255	0.000305	0.00373	0.00989	0.000284	0.000937	0.00174
virus UV	no challenge	T24 post-priming/ T0 challenge	T1	0.00538	0.00428	0.000135	0.003	0.00594	0.000132	0.000613	0.000893
virus UV	no challenge	T24 post-priming/ T0 challenge	T1	0.00971	0.00484	0.000335	0.00376	0.00801	8.74e-05	0.00125	0.000691
free virus UV	no challenge	T24 post-priming/ T0 challenge	T1	0.00274	0.000961	0.00035	0.00099	0.0014	0.000542	0.000747	0.00118
free virus UV	no challenge	T24 post-priming/ T0 challenge	T1	0.00187	0.00168	0.000122	0.000444	0.0116	0.000211	0.00122	0.000976
free virus UV	no challenge	T24 post-priming/ T0 challenge	T1	0.00153	0.00338	0.000197	0.00146	0.00925	0.000134	0.00159	0.00117
free virus UV	no challenge	T24 post-priming/ T0 challenge	T1	0.00238	0.000272	8.23e-05	0.00066	0.0147	8.16e-05	0.00078	0.000394
free virus UV	no challenge	T24 post-priming/ T0 challenge	T1	0.00216	0.000195	0.000255	0.000219	0.00396	0.000223	0.000507	0.000664
free virus UV	no challenge	T24 post-priming/ T0 challenge	T1	0.00171	0.00157	0.000231	0.000587	0.00849	0.000249	0.00114	0.00248
free virus UV	no challenge	T24 post-priming/ T0 challenge	T1	0.00284	0.00214	0.000194	0.000326	0.00611	0.00023	0.00119	0.000768
free virus UV	no challenge	T24 post-priming/ T0 challenge	T1	0.0018	0.000505	0.000183	0.000621	0.011	0.00037	0.00106	8.96e-05
free virus UV	no challenge	T24 post-priming/ T0 challenge	T1	0.00115	0.000417	0.000289	0.000151	0.00272	0.000417	0.00126	0.000504
free virus UV	no challenge	T24 post-priming/ T0 challenge	T1	0.00179	0.000147	2.68e-05	0.000334	0.00586	0.000308	0.000869	0.000668
FSW	no challenge	T24 post-priming/ T0 challenge	T1	0.000764	0.00149	0	0.000233	0.00841	0.000196	0.00136	0.000408
FSW	no challenge	T24 post-priming/ T0 challenge	T1	0.00145	0.00182	0.000157	0.000657	0.00413	0.000189	0.00113	0.000759
FSW	no challenge	T24 post-priming/ T0 challenge	T1	0.00137	0.00195	0.000249	0.000383	0.011	0.000421	0.00132	0.000488
FSW	no challenge	T24 post-priming/ T0 challenge	T1	0.000406	0.00224	0.000173	0.000118	0.00589	0.000216	0.000601	0.00048
FSW	no challenge	T24 post-priming/ T0 challenge	T1	0.00111	0.000247	0.00024	0.000432	0.0113	0.000689	0.0014	0.000592
FSW	no challenge	T24 post-priming/ T0 challenge	T1	0.00146	0.000533	0.000217	0.00039	0.00691	0.000402	0.00138	0.000754
FSW	no challenge	T24 post-priming/ T0 challenge	T1	0.00124	0.000877	0.00028	0.000533	0.00276	5.34e-05	0.00098	0.000414
FSW	no challenge	T24 post-priming/ T0 challenge	T1	0.000715	0.00291	0.00016	0.000389	0.00361	0.000194	0.00122	0.000374
FSW	no challenge	T24 post-priming/ T0 challenge	T1	0.000432	0.00113	0.000375	0.000459	0.00496	0.00063	0.00107	0.00113
FSW	no challenge	T24 post-priming/ T0 challenge	T1	0.000854	0.000282	6.49e-05	0.000599	0.00522	0.00065	0.00183	0.000555
PIC	no challenge	T24 post-priming/ T0 challenge	T1	0.0197	0.00171	0.000986	0.0209	0.0256	0.000935	0.00152	0.0175
PIC	no challenge	T24 post-priming/ T0 challenge	T1	0.0286	0.0149	0.00103	0.0206	0.0576	0.00189	0.00221	0.00647
PIC	no challenge	T24 post-priming/ T0 challenge	T1	0.028	0.00178	0.00113	0.0149	0.00416	0.000626	0.00284	0.00578
PIC	no challenge	T24 post-priming/ T0 challenge	T1	0.0138	0.0126	0.000847	0.012	0.0328	0.000574	0.00151	0.00547
PIC	no challenge	T24 post-priming/ T0 challenge	T1	0.0336	0.0178	0.00138	0.0231	0.0604	0.000811	0.00212	0.0167
PIC	no challenge	T24 post-priming/ T0 challenge	T1	0.03	0.00872	0.000803	0.0189	0.0607	0.000285	0.00104	0.00624
PIC	no challenge	T24 post-priming/ T0 challenge	T1	0.0195	0.0116	0.0011	0.00883	0.00333	0.000928	0.00245	0.00254
PIC	no challenge	T24 post-priming/ T0 challenge	T1	0.0326	0.00155	0.00046	0.0166	0.0169	0.000491	0.00105	0.00746
PIC	no challenge	T24 post-priming/ T0 challenge	T1	0.0615	0.00171	0.00124	0.0323	0.057	0.000939	0.00149	0.0246
PIC	no challenge	T24 post-priming/ T0 challenge	T1	0.0333	0.00129	0.000495	0.0116	0.0105	0.000154	0.00192	0.014

## Sheet: FC calculation
Sampling				FC (ratio Cp 24hrs post-priming versus T0)										Mean FC (ratio Cp 24hrs post-priming versus T0)
Exposition	Challenge	sampling	time point	viperin	RLR	ADAR	IRF2	MyD88	ATG8	Beclin	IAP18			Exposition	Challenge	priming	viperin	RLR	ADAR	IRF2	MyD88	ATG8	Beclin	IAP18
virus UV	no challenge	T24 post-priming/ T0 challenge	T4	61.8677	26.3111	0.289796	4.97275	18.1405	0.203497	0.303058	1.18889			virus UV	no challenge	T24 post-priming/ T0 challenge	9.32671	3.114	0.307233	5.08284	16.8342	0.116755	0.152338	0.585955
virus UV	no challenge	T24 post-priming/ T0 challenge	T1	67.7043	28.3556	0.393197	8.6376	25.8264	0.0818182	0.171254	1.43889			free virus UV	no challenge	T24 post-priming/ T0 challenge	1.89895	0.691201	0.180735	0.693009	13.521	0.153512	0.164686	0.399912
virus UV	no challenge	T24 post-priming/ T0 challenge	T1	1.80156	29.2444	0.579592	0.412807	26.6529	0.118881	0.495413	0.455			FSW	no challenge	T24 post-priming/ T0 challenge	0.931977	0.826902	0.179405	0.50169	11.5583	0.20207	0.195326	0.267729
virus UV	no challenge	T24 post-priming/ T0 challenge	T1	73.93	9.51111	0.666667	7.23433	27.0661	0.185315	0.254128	0.577778			PIC	no challenge	T24 post-priming/ T0 challenge	28.584	4.51885	0.886866	21.5046	59.2394	0.423691	0.288435	4.8006
virus UV	no challenge	T24 post-priming/ T0 challenge	T1	22.179	31.6444	0.383673	3.86921	15.4132	0.1	0.138838	0.594444
virus UV	no challenge	T24 post-priming/ T0 challenge	T1	19.0661	42.7111	0.657143	5.59946	14.6901	0.21049	0.394495	0.783333
virus UV	no challenge	T24 post-priming/ T0 challenge	T1	39.2996	5.95556	0.439456	7.07084	16.1157	0.218881	0.318043	0.354444
virus UV	no challenge	T24 post-priming/ T0 challenge	T1	37.0817	11.3333	0.414966	5.08174	20.4339	0.198601	0.286544	0.966667
virus UV	no challenge	T24 post-priming/ T0 challenge	T1	20.9339	19.0222	0.183673	4.08719	12.2727	0.0923077	0.187462	0.496111
virus UV	no challenge	T24 post-priming/ T0 challenge	T1	37.7821	21.5111	0.455782	5.12262	16.5496	0.0611189	0.382263	0.383889
virus UV	no challenge	T24 post-priming/ T0 challenge	T1	4.12987	0.325275	0.204808	3.37963	7.98182	0.103559	0.162193	0.727891
virus UV	no challenge	T24 post-priming/ T0 challenge	T1	4.51948	0.350549	0.277885	5.87037	11.3636	0.041637	0.091653	0.880952
virus UV	no challenge	T24 post-priming/ T0 challenge	T1	0.12026	0.361538	0.409615	0.280556	11.7273	0.0604982	0.265139	0.278571
virus UV	no challenge	T24 post-priming/ T0 challenge	T1	4.93506	0.117582	0.471154	4.91667	11.9091	0.094306	0.136007	0.353741
virus UV	no challenge	T24 post-priming/ T0 challenge	T1	1.48052	0.391209	0.271154	2.62963	6.78182	0.0508897	0.0743044	0.363946
virus UV	no challenge	T24 post-priming/ T0 challenge	T1	1.27273	0.528022	0.464423	3.80556	6.46364	0.107117	0.211129	0.479592
virus UV	no challenge	T24 post-priming/ T0 challenge	T1	2.62338	0.0736264	0.310577	4.80556	7.09091	0.111388	0.170213	0.217007
virus UV	no challenge	T24 post-priming/ T0 challenge	T1	2.47532	0.14011	0.293269	3.4537	8.99091	0.101068	0.153355	0.591837
virus UV	no challenge	T24 post-priming/ T0 challenge	T1	1.3974	0.235165	0.129808	2.77778	5.4	0.0469751	0.100327	0.303741
virus UV	no challenge	T24 post-priming/ T0 challenge	T1	2.52208	0.265934	0.322115	3.48148	7.28182	0.0311032	0.204583	0.235034
virus UV	no challenge	T24 post-priming/ T0 challenge	T1	4.41667	3.56627	0.154348	3.09322	8.05505	0.132877	0.15856	0.772563
virus UV	no challenge	T24 post-priming/ T0 challenge	T1	4.83333	3.84337	0.20942	5.37288	11.4679	0.0534247	0.0896	0.935018
virus UV	no challenge	T24 post-priming/ T0 challenge	T1	0.128611	3.96386	0.308696	0.25678	11.8349	0.0776256	0.2592	0.295668
virus UV	no challenge	T24 post-priming/ T0 challenge	T1	5.27778	1.28916	0.355072	4.5	12.0183	0.121005	0.13296	0.375451
virus UV	no challenge	T24 post-priming/ T0 challenge	T1	1.58333	4.28916	0.204348	2.40678	6.84404	0.0652968	0.07264	0.386282
virus UV	no challenge	T24 post-priming/ T0 challenge	T1	1.36111	5.78916	0.35	3.48305	6.52294	0.137443	0.2064	0.509025
virus UV	no challenge	T24 post-priming/ T0 challenge	T1	2.80556	0.807229	0.234058	4.39831	7.15596	0.142922	0.1664	0.230325
virus UV	no challenge	T24 post-priming/ T0 challenge	T1	2.64722	1.53614	0.221014	3.16102	9.07339	0.12968	0.14992	0.628159
virus UV	no challenge	T24 post-priming/ T0 challenge	T1	1.49444	2.57831	0.0978261	2.54237	5.44954	0.060274	0.09808	0.322383
virus UV	no challenge	T24 post-priming/ T0 challenge	T1	2.69722	2.91566	0.242754	3.18644	7.34862	0.0399087	0.2	0.249458
virus UV	no challenge	T24 post-priming/ T0 challenge	T1	9.46429	0.625132	0.162595	5.86817	20.5621	0.20069	0.121894	0.418787
virus UV	no challenge	T24 post-priming/ T0 challenge	T1	10.3571	0.673706	0.220611	10.1929	29.274	0.0806897	0.0688807	0.506849
virus UV	no challenge	T24 post-priming/ T0 challenge	T1	0.275595	0.694826	0.325191	0.487138	30.2108	0.117241	0.199262	0.160274
virus UV	no challenge	T24 post-priming/ T0 challenge	T1	11.3095	0.225977	0.374046	8.53698	30.6792	0.182759	0.102214	0.203523
virus UV	no challenge	T24 post-priming/ T0 challenge	T1	3.39286	0.751848	0.215267	4.56592	17.4707	0.0986207	0.0558426	0.209393
virus UV	no challenge	T24 post-priming/ T0 challenge	T1	2.91667	1.01478	0.368702	6.60772	16.6511	0.207586	0.158672	0.27593
virus UV	no challenge	T24 post-priming/ T0 challenge	T1	6.0119	0.141499	0.246565	8.34405	18.267	0.215862	0.127921	0.124853
virus UV	no challenge	T24 post-priming/ T0 challenge	T1	5.67262	0.269271	0.232824	5.99678	23.1616	0.195862	0.115252	0.340509
virus UV	no challenge	T24 post-priming/ T0 challenge	T1	3.20238	0.451954	0.103053	4.82315	13.911	0.0910345	0.0753998	0.174755
virus UV	no challenge	T24 post-priming/ T0 challenge	T1	5.77976	0.511088	0.255725	6.04502	18.7588	0.0602759	0.153752	0.135225
virus UV	no challenge	T24 post-priming/ T0 challenge	T1	2.81915	0.293069	0.188496	2.68382	10.0343	0.0926752	0.156804	0.380107
virus UV	no challenge	T24 post-priming/ T0 challenge	T1	3.08511	0.315842	0.255752	4.66176	14.2857	0.0372611	0.0886076	0.460036
virus UV	no challenge	T24 post-priming/ T0 challenge	T1	0.0820922	0.325743	0.376991	0.222794	14.7429	0.0541401	0.256329	0.145471
virus UV	no challenge	T24 post-priming/ T0 challenge	T1	3.36879	0.105941	0.433628	3.90441	14.9714	0.0843949	0.131487	0.184725
virus UV	no challenge	T24 post-priming/ T0 challenge	T1	1.01064	0.352475	0.249558	2.08824	8.52571	0.0455414	0.0718354	0.190053
virus UV	no challenge	T24 post-priming/ T0 challenge	T1	0.868794	0.475743	0.427434	3.02206	8.12571	0.0958599	0.204114	0.250444
virus UV	no challenge	T24 post-priming/ T0 challenge	T1	1.79078	0.0663366	0.285841	3.81618	8.91429	0.0996815	0.164557	0.113321
virus UV	no challenge	T24 post-priming/ T0 challenge	T1	1.68972	0.126238	0.269912	2.74265	11.3029	0.0904459	0.148259	0.309059
virus UV	no challenge	T24 post-priming/ T0 challenge	T1	0.953901	0.211881	0.119469	2.20588	6.78857	0.0420382	0.0969937	0.158615
virus UV	no challenge	T24 post-priming/ T0 challenge	T1	1.72163	0.239604	0.29646	2.76471	9.15429	0.0278344	0.197785	0.122735
virus UV	no challenge	T24 post-priming/ T0 challenge	T1	7.32719	0.801083	0.202857	1.47773	16.2894	0.151563	0.102588	0.558747
virus UV	no challenge	T24 post-priming/ T0 challenge	T1	8.01843	0.863329	0.275238	2.5668	23.1911	0.0609375	0.057971	0.67624
virus UV	no challenge	T24 post-priming/ T0 challenge	T1	0.213364	0.890392	0.405714	0.122672	23.9332	0.0885417	0.167702	0.213838
virus UV	no challenge	T24 post-priming/ T0 challenge	T1	8.75576	0.289581	0.466667	2.1498	24.3043	0.138021	0.0860248	0.27154
virus UV	no challenge	T24 post-priming/ T0 challenge	T1	2.62673	0.963464	0.268571	1.1498	13.8404	0.0744792	0.0469979	0.279373
virus UV	no challenge	T24 post-priming/ T0 challenge	T1	2.25806	1.30041	0.46	1.66397	13.1911	0.156771	0.13354	0.368146
virus UV	no challenge	T24 post-priming/ T0 challenge	T1	4.65438	0.181326	0.307619	2.10121	14.4712	0.163021	0.10766	0.16658
virus UV	no challenge	T24 post-priming/ T0 challenge	T1	4.39171	0.345061	0.290476	1.51012	18.3488	0.147917	0.0969979	0.454308
virus UV	no challenge	T24 post-priming/ T0 challenge	T1	2.47926	0.579161	0.128571	1.21457	11.0204	0.06875	0.0634576	0.233159
virus UV	no challenge	T24 post-priming/ T0 challenge	T1	4.47465	0.654939	0.319048	1.52227	14.8609	0.0455208	0.1294	0.180418
virus UV	no challenge	T24 post-priming/ T0 challenge	T1	7.87129	1.09024	0.247387	0.83908	24.3889	0.20069	0.07928	0.664596
virus UV	no challenge	T24 post-priming/ T0 challenge	T1	8.61386	1.17495	0.335656	1.45747	34.7222	0.0806897	0.0448	0.804348
virus UV	no challenge	T24 post-priming/ T0 challenge	T1	0.229208	1.21179	0.494774	0.0696552	35.8333	0.117241	0.1296	0.254348
virus UV	no challenge	T24 post-priming/ T0 challenge	T1	9.40594	0.394107	0.569106	1.22069	36.3889	0.182759	0.06648	0.322981
virus UV	no challenge	T24 post-priming/ T0 challenge	T1	2.82178	1.31123	0.327526	0.652874	20.7222	0.0986207	0.03632	0.332298
virus UV	no challenge	T24 post-priming/ T0 challenge	T1	2.42574	1.7698	0.560976	0.944828	19.75	0.207586	0.1032	0.437888
virus UV	no challenge	T24 post-priming/ T0 challenge	T1	5	0.246777	0.375145	1.1931	21.6667	0.215862	0.0832	0.198137
virus UV	no challenge	T24 post-priming/ T0 challenge	T1	4.71782	0.469613	0.354239	0.857471	27.4722	0.195862	0.07496	0.540373
virus UV	no challenge	T24 post-priming/ T0 challenge	T1	2.66337	0.788214	0.156794	0.689655	16.5	0.0910345	0.04904	0.277329
virus UV	no challenge	T24 post-priming/ T0 challenge	T1	4.80693	0.891344	0.389082	0.864368	22.25	0.0602759	0.1	0.214596
virus UV	no challenge	T24 post-priming/ T0 challenge	T1	21.5156	0.843305	0.225875	18.0693	11.9619	0.176364	0.119254	1.82906
virus UV	no challenge	T24 post-priming/ T0 challenge	T1	23.5453	0.908832	0.306469	31.3861	17.03	0.0709091	0.0673887	2.21368
virus UV	no challenge	T24 post-priming/ T0 challenge	T1	0.626522	0.937322	0.45175	1.5	17.5749	0.10303	0.194946	0.7
virus UV	no challenge	T24 post-priming/ T0 challenge	T1	25.7104	0.304843	0.519618	26.2871	17.8474	0.160606	0.1	0.888889
virus UV	no challenge	T24 post-priming/ T0 challenge	T1	7.71313	1.01425	0.299046	14.0594	10.1635	0.0866667	0.054633	0.91453
virus UV	no challenge	T24 post-priming/ T0 challenge	T1	6.63058	1.36895	0.512195	20.3465	9.68665	0.182424	0.155235	1.20513
virus UV	no challenge	T24 post-priming/ T0 challenge	T1	13.6671	0.190883	0.342524	25.6931	10.6267	0.189697	0.12515	0.545299
virus UV	no challenge	T24 post-priming/ T0 challenge	T1	12.8958	0.363248	0.323436	18.4653	13.4741	0.172121	0.112756	1.48718
virus UV	no challenge	T24 post-priming/ T0 challenge	T1	7.28011	0.609687	0.14316	14.8515	8.09264	0.08	0.0737665	0.763248
virus UV	no challenge	T24 post-priming/ T0 challenge	T1	13.1394	0.689459	0.355249	18.6139	10.9128	0.0529697	0.150421	0.590598
virus UV	no challenge	T24 post-priming/ T0 challenge	T1	25.2381	1.67705	0.129878		28.8816	0.184177	0.219248	2.32862
virus UV	no challenge	T24 post-priming/ T0 challenge	T1	27.619	1.80737	0.17622		41.1184	0.0740506	0.123894	2.81828
virus UV	no challenge	T24 post-priming/ T0 challenge	T1	0.734921	1.86402	0.259756		42.4342	0.107595	0.358407	0.891186
virus UV	no challenge	T24 post-priming/ T0 challenge	T1	30.1587	0.606232	0.29878		43.0921	0.167722	0.18385	1.13166
virus UV	no challenge	T24 post-priming/ T0 challenge	T1	9.04762	2.017	0.171951		24.5395	0.0905063	0.100442	1.16431
virus UV	no challenge	T24 post-priming/ T0 challenge	T1	7.77778	2.72238	0.294512		23.3882	0.190506	0.285398	1.53428
virus UV	no challenge	T24 post-priming/ T0 challenge	T1	16.0317	0.379603	0.196951		25.6579	0.198101	0.230088	0.694233
virus UV	no challenge	T24 post-priming/ T0 challenge	T1	15.127	0.72238	0.185976		32.5329	0.179747	0.207301	1.89336
virus UV	no challenge	T24 post-priming/ T0 challenge	T1	8.53968	1.21246	0.0823171		19.5395	0.0835443	0.135619	0.971708
virus UV	no challenge	T24 post-priming/ T0 challenge	T1	15.4127	1.3711	0.204268		26.3487	0.0553165	0.276549	0.751904
virus UV	no challenge	T24 post-priming/ T0 challenge	T1	6.54321	0.785146	0.188496	3.28829	11.8011	0.169186	0.151994	0.753521
virus UV	no challenge	T24 post-priming/ T0 challenge	T1	7.16049	0.846154	0.255752	5.71171	16.8011	0.0680233	0.0858896	0.911972
virus UV	no challenge	T24 post-priming/ T0 challenge	T1	0.190535	0.872679	0.376991	0.272973	17.3387	0.0988372	0.248466	0.28838
virus UV	no challenge	T24 post-priming/ T0 challenge	T1	7.81893	0.28382	0.433628	4.78378	17.6075	0.15407	0.127454	0.366197
virus UV	no challenge	T24 post-priming/ T0 challenge	T1	2.34568	0.944297	0.249558	2.55856	10.0269	0.0831395	0.0696319	0.376761
virus UV	no challenge	T24 post-priming/ T0 challenge	T1	2.01646	1.27454	0.427434	3.7027	9.55645	0.175	0.197853	0.496479
virus UV	no challenge	T24 post-priming/ T0 challenge	T1	4.15638	0.177719	0.285841	4.67568	10.4839	0.181977	0.159509	0.224648
virus UV	no challenge	T24 post-priming/ T0 challenge	T1	3.92181	0.338196	0.269912	3.36036	13.293	0.165116	0.143712	0.612676
virus UV	no challenge	T24 post-priming/ T0 challenge	T1	2.21399	0.567639	0.119469	2.7027	7.98387	0.0767442	0.0940184	0.314437
virus UV	no challenge	T24 post-priming/ T0 challenge	T1	3.99588	0.64191	0.29646	3.38739	10.7661	0.050814	0.191718	0.24331
free virus UV	no challenge	T24 post-priming/ T0 challenge	T1	10.6615	4.27111	0.47619	1.34877	2.89256	0.379021	0.22844	0.655556
free virus UV	no challenge	T24 post-priming/ T0 challenge	T1	7.27626	7.46667	0.165986	0.604905	23.9669	0.147552	0.373089	0.542222
free virus UV	no challenge	T24 post-priming/ T0 challenge	T1	5.95331	15.0222	0.268027	1.9891	19.1116	0.0937063	0.486239	0.65
free virus UV	no challenge	T24 post-priming/ T0 challenge	T1	9.2607	1.20889	0.111973	0.899183	30.3719	0.0570629	0.238532	0.218889
free virus UV	no challenge	T24 post-priming/ T0 challenge	T1	8.40467	0.866667	0.346939	0.298365	8.18182	0.155944	0.155046	0.368889
free virus UV	no challenge	T24 post-priming/ T0 challenge	T1	6.6537	6.97778	0.314286	0.799728	17.5413	0.174126	0.348624	1.37778
free virus UV	no challenge	T24 post-priming/ T0 challenge	T1	11.0506	9.51111	0.263946	0.444142	12.624	0.160839	0.363914	0.426667
free virus UV	no challenge	T24 post-priming/ T0 challenge	T1	7.00389	2.24444	0.24898	0.846049	22.7273	0.258741	0.324159	0.0497778
free virus UV	no challenge	T24 post-priming/ T0 challenge	T1	4.47471	1.85333	0.393197	0.205722	5.61983	0.291608	0.385321	0.28
free virus UV	no challenge	T24 post-priming/ T0 challenge	T1	6.96498	0.653333	0.0364626	0.455041	12.1074	0.215385	0.265749	0.371111
free virus UV	no challenge	T24 post-priming/ T0 challenge	T1	0.711688	0.0528022	0.336538	0.916667	1.27273	0.192883	0.122259	0.401361
free virus UV	no challenge	T24 post-priming/ T0 challenge	T1	0.485714	0.0923077	0.117308	0.411111	10.5455	0.075089	0.199673	0.331973
free virus UV	no challenge	T24 post-priming/ T0 challenge	T1	0.397403	0.185714	0.189423	1.35185	8.40909	0.0476868	0.260229	0.397959
free virus UV	no challenge	T24 post-priming/ T0 challenge	T1	0.618182	0.0149451	0.0791346	0.611111	13.3636	0.0290391	0.12766	0.134014
free virus UV	no challenge	T24 post-priming/ T0 challenge	T1	0.561039	0.0107143	0.245192	0.202778	3.6	0.0793594	0.0829787	0.22585
free virus UV	no challenge	T24 post-priming/ T0 challenge	T1	0.444156	0.0862637	0.222115	0.543519	7.71818	0.0886121	0.186579	0.843537
free virus UV	no challenge	T24 post-priming/ T0 challenge	T1	0.737662	0.117582	0.186538	0.301852	5.55455	0.0818505	0.194763	0.261224
free virus UV	no challenge	T24 post-priming/ T0 challenge	T1	0.467532	0.0277473	0.175962	0.575	10	0.131673	0.173486	0.0304762
free virus UV	no challenge	T24 post-priming/ T0 challenge	T1	0.298701	0.0229121	0.277885	0.139815	2.47273	0.148399	0.206219	0.171429
free virus UV	no challenge	T24 post-priming/ T0 challenge	T1	0.464935	0.00807692	0.0257692	0.309259	5.32727	0.109609	0.142226	0.227211
free virus UV	no challenge	T24 post-priming/ T0 challenge	T1	0.761111	0.578916	0.253623	0.838983	1.2844	0.247489	0.11952	0.425993
free virus UV	no challenge	T24 post-priming/ T0 challenge	T1	0.519444	1.01205	0.0884058	0.376271	10.6422	0.096347	0.1952	0.352347
free virus UV	no challenge	T24 post-priming/ T0 challenge	T1	0.425	2.03614	0.142754	1.23729	8.48624	0.0611872	0.2544	0.422383
free virus UV	no challenge	T24 post-priming/ T0 challenge	T1	0.661111	0.163855	0.0596377	0.559322	13.4862	0.0372603	0.1248	0.142238
free virus UV	no challenge	T24 post-priming/ T0 challenge	T1	0.6	0.11747	0.184783	0.185593	3.63303	0.101826	0.08112	0.239711
free virus UV	no challenge	T24 post-priming/ T0 challenge	T1	0.475	0.945783	0.167391	0.497458	7.78899	0.113699	0.1824	0.895307
free virus UV	no challenge	T24 post-priming/ T0 challenge	T1	0.788889	1.28916	0.14058	0.276271	5.6055	0.105023	0.1904	0.277256
free virus UV	no challenge	T24 post-priming/ T0 challenge	T1	0.5	0.304217	0.132609	0.526271	10.0917	0.16895	0.1696	0.0323466
free virus UV	no challenge	T24 post-priming/ T0 challenge	T1	0.319444	0.251205	0.20942	0.127966	2.49541	0.190411	0.2016	0.181949
free virus UV	no challenge	T24 post-priming/ T0 challenge	T1	0.497222	0.0885542	0.0194203	0.283051	5.37615	0.140639	0.13904	0.241155
free virus UV	no challenge	T24 post-priming/ T0 challenge	T1	1.63095	0.101478	0.267176	1.59164	3.27869	0.373793	0.0918819	0.23092
free virus UV	no challenge	T24 post-priming/ T0 challenge	T1	1.1131	0.177402	0.0931298	0.713826	27.1663	0.145517	0.150062	0.190998
free virus UV	no challenge	T24 post-priming/ T0 challenge	T1	0.910714	0.356917	0.150382	2.34727	21.6628	0.0924138	0.195572	0.228963
free virus UV	no challenge	T24 post-priming/ T0 challenge	T1	1.41667	0.0287223	0.0628244	1.06109	34.4262	0.0562759	0.095941	0.0771037
free virus UV	no challenge	T24 post-priming/ T0 challenge	T1	1.28571	0.0205913	0.194656	0.35209	9.274	0.153793	0.0623616	0.129941
free virus UV	no challenge	T24 post-priming/ T0 challenge	T1	1.01786	0.165787	0.176336	0.94373	19.8829	0.171724	0.140221	0.485323
free virus UV	no challenge	T24 post-priming/ T0 challenge	T1	1.69048	0.225977	0.148092	0.524116	14.3091	0.158621	0.146371	0.150294
free virus UV	no challenge	T24 post-priming/ T0 challenge	T1	1.07143	0.0533263	0.139695	0.998392	25.7611	0.255172	0.130381	0.0175342
free virus UV	no challenge	T24 post-priming/ T0 challenge	T1	0.684524	0.0440338	0.220611	0.242765	6.37002	0.287586	0.154982	0.0986301
free virus UV	no challenge	T24 post-priming/ T0 challenge	T1	1.06548	0.0155227	0.020458	0.536977	13.7237	0.212414	0.106888	0.130724
free virus UV	no challenge	T24 post-priming/ T0 challenge	T1	0.485816	0.0475743	0.309735	0.727941	1.6	0.172611	0.118196	0.209591
free virus UV	no challenge	T24 post-priming/ T0 challenge	T1	0.33156	0.0831683	0.107965	0.326471	13.2571	0.0671975	0.193038	0.173357
free virus UV	no challenge	T24 post-priming/ T0 challenge	T1	0.271277	0.167327	0.174336	1.07353	10.5714	0.0426752	0.251582	0.207815
free virus UV	no challenge	T24 post-priming/ T0 challenge	T1	0.421986	0.0134653	0.0728319	0.485294	16.8	0.0259873	0.123418	0.0699822
free virus UV	no challenge	T24 post-priming/ T0 challenge	T1	0.382979	0.00965347	0.225664	0.161029	4.52571	0.0710191	0.0802215	0.11794
free virus UV	no challenge	T24 post-priming/ T0 challenge	T1	0.303191	0.0777228	0.204425	0.431618	9.70286	0.0792994	0.18038	0.440497
free virus UV	no challenge	T24 post-priming/ T0 challenge	T1	0.503546	0.105941	0.171681	0.239706	6.98286	0.0732484	0.188291	0.136412
free virus UV	no challenge	T24 post-priming/ T0 challenge	T1	0.319149	0.025	0.161947	0.456618	12.5714	0.117834	0.167722	0.0159147
free virus UV	no challenge	T24 post-priming/ T0 challenge	T1	0.203901	0.0206436	0.255752	0.111029	3.10857	0.132803	0.199367	0.0895204
free virus UV	no challenge	T24 post-priming/ T0 challenge	T1	0.317376	0.00727723	0.0237168	0.245588	6.69714	0.0980892	0.1375	0.11865
free virus UV	no challenge	T24 post-priming/ T0 challenge	T1	1.26267	0.130041	0.333333	0.40081	2.5974	0.282292	0.0773292	0.308094
free virus UV	no challenge	T24 post-priming/ T0 challenge	T1	0.861751	0.227334	0.11619	0.179757	21.5213	0.109896	0.126294	0.25483
free virus UV	no challenge	T24 post-priming/ T0 challenge	T1	0.705069	0.457375	0.187619	0.591093	17.1614	0.0697917	0.164596	0.305483
free virus UV	no challenge	T24 post-priming/ T0 challenge	T1	1.09677	0.0368065	0.078381	0.267206	27.2727	0.0425	0.0807453	0.102872
free virus UV	no challenge	T24 post-priming/ T0 challenge	T1	0.995392	0.026387	0.242857	0.088664	7.34694	0.116146	0.0524845	0.173368
free virus UV	no challenge	T24 post-priming/ T0 challenge	T1	0.788018	0.212449	0.22	0.237652	15.7514	0.129687	0.118012	0.64752
free virus UV	no challenge	T24 post-priming/ T0 challenge	T1	1.30876	0.289581	0.184762	0.131984	11.3358	0.119792	0.123188	0.200522
free virus UV	no challenge	T24 post-priming/ T0 challenge	T1	0.829493	0.0683356	0.174286	0.251417	20.4082	0.192708	0.109731	0.0233943
free virus UV	no challenge	T24 post-priming/ T0 challenge	T1	0.529954	0.0564276	0.275238	0.0611336	5.04638	0.217188	0.130435	0.131593
free virus UV	no challenge	T24 post-priming/ T0 challenge	T1	0.824885	0.0198917	0.0255238	0.135223	10.872	0.160417	0.0899586	0.174413
free virus UV	no challenge	T24 post-priming/ T0 challenge	T1	1.35644	0.17698	0.406504	0.227586	3.88889	0.373793	0.05976	0.36646
free virus UV	no challenge	T24 post-priming/ T0 challenge	T1	0.925743	0.309392	0.141696	0.102069	32.2222	0.145517	0.0976	0.303106
free virus UV	no challenge	T24 post-priming/ T0 challenge	T1	0.757426	0.622468	0.228804	0.335632	25.6944	0.0924138	0.1272	0.363354
free virus UV	no challenge	T24 post-priming/ T0 challenge	T1	1.17822	0.0500921	0.0955865	0.151724	40.8333	0.0562759	0.0624	0.12236
free virus UV	no challenge	T24 post-priming/ T0 challenge	T1	1.06931	0.0359116	0.296167	0.0503448	11	0.153793	0.04056	0.206211
free virus UV	no challenge	T24 post-priming/ T0 challenge	T1	0.846535	0.289134	0.268293	0.134943	23.5833	0.171724	0.0912	0.770186
free virus UV	no challenge	T24 post-priming/ T0 challenge	T1	1.40594	0.394107	0.225319	0.0749425	16.9722	0.158621	0.0952	0.238509
free virus UV	no challenge	T24 post-priming/ T0 challenge	T1	0.891089	0.0930018	0.212544	0.142759	30.5556	0.255172	0.0848	0.0278261
free virus UV	no challenge	T24 post-priming/ T0 challenge	T1	0.569307	0.0767956	0.335656	0.0347126	7.55556	0.287586	0.1008	0.156522
free virus UV	no challenge	T24 post-priming/ T0 challenge	T1	0.886139	0.0270718	0.0311266	0.0767816	16.2778	0.212414	0.06952	0.207453
free virus UV	no challenge	T24 post-priming/ T0 challenge	T1	3.70771	0.136895	0.371156	4.90099	1.90736	0.328485	0.0898917	1.00855
free virus UV	no challenge	T24 post-priming/ T0 challenge	T1	2.53045	0.239316	0.129374	2.19802	15.8038	0.127879	0.146811	0.834188
free virus UV	no challenge	T24 post-priming/ T0 challenge	T1	2.07037	0.481481	0.208908	7.22772	12.6022	0.0812121	0.191336	1
free virus UV	no challenge	T24 post-priming/ T0 challenge	T1	3.22057	0.0387464	0.0872747	3.26733	20.0272	0.0494545	0.0938628	0.336752
free virus UV	no challenge	T24 post-priming/ T0 challenge	T1	2.92287	0.0277778	0.270414	1.08416	5.3951	0.135152	0.0610108	0.567521
free virus UV	no challenge	T24 post-priming/ T0 challenge	T1	2.31394	0.223647	0.244963	2.90594	11.5668	0.150909	0.137184	2.11966
free virus UV	no challenge	T24 post-priming/ T0 challenge	T1	3.84303	0.304843	0.205726	1.61386	8.32425	0.139394	0.143201	0.65641
free virus UV	no challenge	T24 post-priming/ T0 challenge	T1	2.43572	0.0719373	0.194062	3.07426	14.9864	0.224242	0.127557	0.0765812
free virus UV	no challenge	T24 post-priming/ T0 challenge	T1	1.55616	0.0594017	0.306469	0.747525	3.70572	0.252727	0.151625	0.430769
free virus UV	no challenge	T24 post-priming/ T0 challenge	T1	2.42219	0.0209402	0.0284199	1.65347	7.98365	0.186667	0.104573	0.57094
free virus UV	no challenge	T24 post-priming/ T0 challenge	T1	4.34921	0.272238	0.213415	0	4.60526	0.343038	0.165265	1.284
free virus UV	no challenge	T24 post-priming/ T0 challenge	T1	2.96825	0.475921	0.0743902	0	38.1579	0.133544	0.269912	1.06202
free virus UV	no challenge	T24 post-priming/ T0 challenge	T1	2.42857	0.957507	0.120122	0	30.4276	0.0848101	0.35177	1.27312
free virus UV	no challenge	T24 post-priming/ T0 challenge	T1	3.77778	0.0770538	0.0501829	0	48.3553	0.0516456	0.172566	0.428727
free virus UV	no challenge	T24 post-priming/ T0 challenge	T1	3.42857	0.0552408	0.155488	0	13.0263	0.141139	0.112168	0.722524
free virus UV	no challenge	T24 post-priming/ T0 challenge	T1	2.71429	0.444759	0.140854	0	27.9276	0.157595	0.252212	2.69859
free virus UV	no challenge	T24 post-priming/ T0 challenge	T1	4.50794	0.606232	0.118293	0	20.0987	0.14557	0.263274	0.835691
free virus UV	no challenge	T24 post-priming/ T0 challenge	T1	2.85714	0.143059	0.111585	0	36.1842	0.234177	0.234513	0.0974973
free virus UV	no challenge	T24 post-priming/ T0 challenge	T1	1.8254	0.11813	0.17622	0	8.94737	0.263924	0.278761	0.548422
free virus UV	no challenge	T24 post-priming/ T0 challenge	T1	2.84127	0.0416431	0.0163415	0	19.2763	0.194937	0.192257	0.726877
free virus UV	no challenge	T24 post-priming/ T0 challenge	T1	1.12757	0.127454	0.309735	0.891892	1.88172	0.315116	0.114571	0.415493
free virus UV	no challenge	T24 post-priming/ T0 challenge	T1	0.769547	0.222812	0.107965	0.4	15.5914	0.122674	0.187117	0.343662
free virus UV	no challenge	T24 post-priming/ T0 challenge	T1	0.62963	0.448276	0.174336	1.31532	12.4328	0.077907	0.243865	0.411972
free virus UV	no challenge	T24 post-priming/ T0 challenge	T1	0.979424	0.0360743	0.0728319	0.594595	19.7581	0.0474419	0.119632	0.138732
free virus UV	no challenge	T24 post-priming/ T0 challenge	T1	0.888889	0.0258621	0.225664	0.197297	5.32258	0.129651	0.0777607	0.233803
free virus UV	no challenge	T24 post-priming/ T0 challenge	T1	0.703704	0.208223	0.204425	0.528829	11.4113	0.144767	0.174847	0.873239
free virus UV	no challenge	T24 post-priming/ T0 challenge	T1	1.16872	0.28382	0.171681	0.293694	8.21237	0.133721	0.182515	0.270423
free virus UV	no challenge	T24 post-priming/ T0 challenge	T1	0.740741	0.0669761	0.161947	0.559459	14.7849	0.215116	0.162577	0.0315493
free virus UV	no challenge	T24 post-priming/ T0 challenge	T1	0.473251	0.055305	0.255752	0.136036	3.65591	0.242442	0.193252	0.177465
free virus UV	no challenge	T24 post-priming/ T0 challenge	T1	0.736626	0.019496	0.0237168	0.300901	7.87634	0.17907	0.133282	0.235211
FSW	no challenge	T24 post-priming/ T0 challenge	T1	2.97276	6.62222	0	0.317439	17.376	0.137063	0.415902	0.226667
FSW	no challenge	T24 post-priming/ T0 challenge	T1	5.64202	8.08889	0.213605	0.895095	8.53306	0.132168	0.345566	0.421667
FSW	no challenge	T24 post-priming/ T0 challenge	T1	5.33074	8.66667	0.338776	0.521798	22.7273	0.294406	0.40367	0.271111
FSW	no challenge	T24 post-priming/ T0 challenge	T1	1.57977	9.95556	0.235374	0.160763	12.1694	0.151049	0.183792	0.266667
FSW	no challenge	T24 post-priming/ T0 challenge	T1	4.31907	1.09778	0.326531	0.588556	23.3471	0.481818	0.428135	0.328889
FSW	no challenge	T24 post-priming/ T0 challenge	T1	5.68093	2.36889	0.295238	0.531335	14.2769	0.281119	0.422018	0.418889
FSW	no challenge	T24 post-priming/ T0 challenge	T1	4.8249	3.89778	0.380952	0.726158	5.70248	0.0373427	0.299694	0.23
FSW	no challenge	T24 post-priming/ T0 challenge	T1	2.7821	12.9333	0.217687	0.529973	7.45868	0.135664	0.373089	0.207778
FSW	no challenge	T24 post-priming/ T0 challenge	T1	1.68093	5.02222	0.510204	0.625341	10.2479	0.440559	0.327217	0.627778
FSW	no challenge	T24 post-priming/ T0 challenge	T1	3.32296	1.25333	0.0882993	0.816076	10.7851	0.454545	0.559633	0.308333
FSW	no challenge	T24 post-priming/ T0 challenge	T1	0.198442	0.0818681	0	0.215741	7.64545	0.0697509	0.222586	0.138776
FSW	no challenge	T24 post-priming/ T0 challenge	T1	0.376623	0.1	0.150962	0.608333	3.75455	0.0672598	0.184943	0.258163
FSW	no challenge	T24 post-priming/ T0 challenge	T1	0.355844	0.107143	0.239423	0.35463	10	0.149822	0.216039	0.165986
FSW	no challenge	T24 post-priming/ T0 challenge	T1	0.105455	0.123077	0.166346	0.109259	5.35455	0.0768683	0.0983633	0.163265
FSW	no challenge	T24 post-priming/ T0 challenge	T1	0.288312	0.0135714	0.230769	0.4	10.2727	0.245196	0.229133	0.201361
FSW	no challenge	T24 post-priming/ T0 challenge	T1	0.379221	0.0292857	0.208654	0.361111	6.28182	0.14306	0.225859	0.256463
FSW	no challenge	T24 post-priming/ T0 challenge	T1	0.322078	0.0481868	0.269231	0.493519	2.50909	0.0190036	0.160393	0.140816
FSW	no challenge	T24 post-priming/ T0 challenge	T1	0.185714	0.15989	0.153846	0.360185	3.28182	0.0690391	0.199673	0.127211
FSW	no challenge	T24 post-priming/ T0 challenge	T1	0.112208	0.0620879	0.360577	0.425	4.50909	0.224199	0.175123	0.384354
FSW	no challenge	T24 post-priming/ T0 challenge	T1	0.221818	0.0154945	0.0624038	0.55463	4.74545	0.231317	0.299509	0.188776
FSW	no challenge	T24 post-priming/ T0 challenge	T1	0.212222	0.89759	0	0.197458	7.7156	0.0894977	0.2176	0.147292
FSW	no challenge	T24 post-priming/ T0 challenge	T1	0.402778	1.09639	0.113768	0.55678	3.78899	0.0863014	0.1808	0.274007
FSW	no challenge	T24 post-priming/ T0 challenge	T1	0.380556	1.1747	0.180435	0.324576	10.0917	0.192237	0.2112	0.176173
FSW	no challenge	T24 post-priming/ T0 challenge	T1	0.112778	1.3494	0.125362	0.1	5.40367	0.0986301	0.09616	0.173285
FSW	no challenge	T24 post-priming/ T0 challenge	T1	0.308333	0.148795	0.173913	0.366102	10.367	0.314612	0.224	0.213718
FSW	no challenge	T24 post-priming/ T0 challenge	T1	0.405556	0.321084	0.157246	0.330508	6.33945	0.183562	0.2208	0.272202
FSW	no challenge	T24 post-priming/ T0 challenge	T1	0.344444	0.528313	0.202899	0.451695	2.53211	0.0243836	0.1568	0.149458
FSW	no challenge	T24 post-priming/ T0 challenge	T1	0.198611	1.75301	0.115942	0.329661	3.31193	0.0885845	0.1952	0.135018
FSW	no challenge	T24 post-priming/ T0 challenge	T1	0.12	0.680723	0.271739	0.388983	4.55046	0.287671	0.1712	0.407942
FSW	no challenge	T24 post-priming/ T0 challenge	T1	0.237222	0.16988	0.047029	0.507627	4.78899	0.296804	0.2928	0.200361
FSW	no challenge	T24 post-priming/ T0 challenge	T1	0.454762	0.157339	0	0.374598	19.6956	0.135172	0.167282	0.0798434
FSW	no challenge	T24 post-priming/ T0 challenge	T1	0.863095	0.192186	0.119847	1.05627	9.67213	0.130345	0.138991	0.148532
FSW	no challenge	T24 post-priming/ T0 challenge	T1	0.815476	0.205913	0.190076	0.615756	25.7611	0.290345	0.162362	0.095499
FSW	no challenge	T24 post-priming/ T0 challenge	T1	0.241667	0.236536	0.132061	0.189711	13.7939	0.148966	0.0739237	0.0939335
FSW	no challenge	T24 post-priming/ T0 challenge	T1	0.660714	0.0260824	0.183206	0.694534	26.4637	0.475172	0.172202	0.115851
FSW	no challenge	T24 post-priming/ T0 challenge	T1	0.869048	0.056283	0.165649	0.62701	16.1827	0.277241	0.169742	0.147554
FSW	no challenge	T24 post-priming/ T0 challenge	T1	0.738095	0.0926082	0.21374	0.856913	6.4637	0.0368276	0.120541	0.0810176
FSW	no challenge	T24 post-priming/ T0 challenge	T1	0.425595	0.307286	0.122137	0.625402	8.45433	0.133793	0.150062	0.0731898
FSW	no challenge	T24 post-priming/ T0 challenge	T1	0.257143	0.119324	0.28626	0.737942	11.6159	0.434483	0.131611	0.221135
FSW	no challenge	T24 post-priming/ T0 challenge	T1	0.508333	0.0297782	0.049542	0.963023	12.2248	0.448276	0.225092	0.108611
FSW	no challenge	T24 post-priming/ T0 challenge	T1	0.135461	0.0737624	0	0.171324	9.61143	0.0624204	0.21519	0.0724689
FSW	no challenge	T24 post-priming/ T0 challenge	T1	0.257092	0.090099	0.138938	0.483088	4.72	0.0601911	0.178797	0.134813
FSW	no challenge	T24 post-priming/ T0 challenge	T1	0.242908	0.0965347	0.220354	0.281618	12.5714	0.134076	0.208861	0.0866785
FSW	no challenge	T24 post-priming/ T0 challenge	T1	0.0719858	0.110891	0.153097	0.0867647	6.73143	0.0687898	0.0950949	0.0852575
FSW	no challenge	T24 post-priming/ T0 challenge	T1	0.196809	0.0122277	0.212389	0.317647	12.9143	0.219427	0.221519	0.105151
FSW	no challenge	T24 post-priming/ T0 challenge	T1	0.258865	0.0263861	0.192035	0.286765	7.89714	0.128025	0.218354	0.133925
FSW	no challenge	T24 post-priming/ T0 challenge	T1	0.219858	0.0434158	0.247788	0.391912	3.15429	0.0170064	0.155063	0.0735346
FSW	no challenge	T24 post-priming/ T0 challenge	T1	0.126773	0.144059	0.141593	0.286029	4.12571	0.0617834	0.193038	0.0664298
FSW	no challenge	T24 post-priming/ T0 challenge	T1	0.0765957	0.0559406	0.331858	0.3375	5.66857	0.200637	0.169304	0.20071
FSW	no challenge	T24 post-priming/ T0 challenge	T1	0.151418	0.0139604	0.0574336	0.440441	5.96571	0.207006	0.289557	0.098579
FSW	no challenge	T24 post-priming/ T0 challenge	T1	0.352074	0.201624	0	0.094332	15.603	0.102083	0.140787	0.106527
FSW	no challenge	T24 post-priming/ T0 challenge	T1	0.668203	0.246279	0.149524	0.265992	7.66234	0.0984375	0.116977	0.198172
FSW	no challenge	T24 post-priming/ T0 challenge	T1	0.631336	0.26387	0.237143	0.155061	20.4082	0.219271	0.136646	0.127415
FSW	no challenge	T24 post-priming/ T0 challenge	T1	0.187097	0.303112	0.164762	0.0477733	10.9276	0.1125	0.0622153	0.125326
FSW	no challenge	T24 post-priming/ T0 challenge	T1	0.511521	0.0334235	0.228571	0.174899	20.9647	0.358854	0.144928	0.154569
FSW	no challenge	T24 post-priming/ T0 challenge	T1	0.672811	0.0721245	0.206667	0.157895	12.82	0.209375	0.142857	0.196867
FSW	no challenge	T24 post-priming/ T0 challenge	T1	0.571429	0.118674	0.266667	0.215789	5.12059	0.0278125	0.101449	0.108094
FSW	no challenge	T24 post-priming/ T0 challenge	T1	0.329493	0.393775	0.152381	0.15749	6.69759	0.101042	0.126294	0.0976501
FSW	no challenge	T24 post-priming/ T0 challenge	T1	0.199078	0.152909	0.357143	0.18583	9.20223	0.328125	0.110766	0.295039
FSW	no challenge	T24 post-priming/ T0 challenge	T1	0.393548	0.0381597	0.0618095	0.24251	9.6846	0.338542	0.189441	0.144909
FSW	no challenge	T24 post-priming/ T0 challenge	T1	0.378218	0.274401	0	0.0535632	23.3611	0.135172	0.1088	0.126708
FSW	no challenge	T24 post-priming/ T0 challenge	T1	0.717822	0.335175	0.182346	0.151034	11.4722	0.130345	0.0904	0.235714
FSW	no challenge	T24 post-priming/ T0 challenge	T1	0.678218	0.359116	0.289199	0.088046	30.5556	0.290345	0.1056	0.151553
FSW	no challenge	T24 post-priming/ T0 challenge	T1	0.20099	0.412523	0.200929	0.0271264	16.3611	0.148966	0.04808	0.149068
FSW	no challenge	T24 post-priming/ T0 challenge	T1	0.549505	0.045488	0.278746	0.0993103	31.3889	0.475172	0.112	0.183851
FSW	no challenge	T24 post-priming/ T0 challenge	T1	0.722772	0.0981584	0.252033	0.0896552	19.1944	0.277241	0.1104	0.234161
FSW	no challenge	T24 post-priming/ T0 challenge	T1	0.613861	0.16151	0.325203	0.122529	7.66667	0.0368276	0.0784	0.128571
FSW	no challenge	T24 post-priming/ T0 challenge	T1	0.35396	0.535912	0.18583	0.0894253	10.0278	0.133793	0.0976	0.116149
FSW	no challenge	T24 post-priming/ T0 challenge	T1	0.213861	0.208103	0.43554	0.105517	13.7778	0.434483	0.0856	0.350932
FSW	no challenge	T24 post-priming/ T0 challenge	T1	0.422772	0.0519337	0.0753775	0.137701	14.5	0.448276	0.1464	0.17236
FSW	no challenge	T24 post-priming/ T0 challenge	T1	1.03383	0.212251	0	1.15347	11.4578	0.118788	0.163658	0.348718
FSW	no challenge	T24 post-priming/ T0 challenge	T1	1.96211	0.259259	0.16649	3.25248	5.6267	0.114545	0.135981	0.648718
FSW	no challenge	T24 post-priming/ T0 challenge	T1	1.85386	0.277778	0.264051	1.89604	14.9864	0.255152	0.158845	0.417094
FSW	no challenge	T24 post-priming/ T0 challenge	T1	0.549391	0.319088	0.183457	0.584158	8.02452	0.130909	0.0723225	0.410256
FSW	no challenge	T24 post-priming/ T0 challenge	T1	1.50203	0.0351852	0.254507	2.13861	15.3951	0.417576	0.168472	0.505983
FSW	no challenge	T24 post-priming/ T0 challenge	T1	1.97564	0.0759259	0.230117	1.93069	9.41417	0.243636	0.166065	0.644444
FSW	no challenge	T24 post-priming/ T0 challenge	T1	1.67794	0.124929	0.296925	2.63861	3.76022	0.0323636	0.11793	0.353846
FSW	no challenge	T24 post-priming/ T0 challenge	T1	0.967524	0.41453	0.169671	1.92574	4.91826	0.117576	0.146811	0.319658
FSW	no challenge	T24 post-priming/ T0 challenge	T1	0.584574	0.160969	0.397667	2.27228	6.75749	0.381818	0.128761	0.965812
FSW	no challenge	T24 post-priming/ T0 challenge	T1	1.15562	0.0401709	0.0688229	2.96535	7.11172	0.393939	0.220217	0.474359
FSW	no challenge	T24 post-priming/ T0 challenge	T1	1.2127	0.422096	0	0	27.6645	0.124051	0.300885	0.443961
FSW	no challenge	T24 post-priming/ T0 challenge	T1	2.30159	0.515581	0.0957317	0	13.5855	0.11962	0.25	0.825898
FSW	no challenge	T24 post-priming/ T0 challenge	T1	2.1746	0.552408	0.151829	0	36.1842	0.266456	0.292035	0.531012
FSW	no challenge	T24 post-priming/ T0 challenge	T1	0.644444	0.634561	0.105488	0	19.375	0.136709	0.132965	0.522307
FSW	no challenge	T24 post-priming/ T0 challenge	T1	1.7619	0.0699717	0.146341	0	37.1711	0.436076	0.309735	0.644178
FSW	no challenge	T24 post-priming/ T0 challenge	T1	2.31746	0.150992	0.132317	0	22.7303	0.25443	0.30531	0.820457
FSW	no challenge	T24 post-priming/ T0 challenge	T1	1.96825	0.248442	0.170732	0	9.07895	0.0337975	0.216814	0.45049
FSW	no challenge	T24 post-priming/ T0 challenge	T1	1.13492	0.824363	0.097561	0	11.875	0.122785	0.269912	0.406964
FSW	no challenge	T24 post-priming/ T0 challenge	T1	0.685714	0.320113	0.228659	0	16.3158	0.398734	0.236726	1.2296
FSW	no challenge	T24 post-priming/ T0 challenge	T1	1.35556	0.0798867	0.0395732	0	17.1711	0.411392	0.404867	0.603917
FSW	no challenge	T24 post-priming/ T0 challenge	T1	0.314403	0.197613	0	0.20991	11.3038	0.113953	0.208589	0.143662
FSW	no challenge	T24 post-priming/ T0 challenge	T1	0.596708	0.241379	0.138938	0.591892	5.55108	0.109884	0.173313	0.267254
FSW	no challenge	T24 post-priming/ T0 challenge	T1	0.563786	0.258621	0.220354	0.345045	14.7849	0.244767	0.202454	0.171831
FSW	no challenge	T24 post-priming/ T0 challenge	T1	0.167078	0.297082	0.153097	0.106306	7.91667	0.125581	0.0921779	0.169014
FSW	no challenge	T24 post-priming/ T0 challenge	T1	0.45679	0.0327586	0.212389	0.389189	15.1882	0.400581	0.214724	0.208451
FSW	no challenge	T24 post-priming/ T0 challenge	T1	0.600823	0.0706897	0.192035	0.351351	9.28763	0.233721	0.211656	0.265493
FSW	no challenge	T24 post-priming/ T0 challenge	T1	0.510288	0.116313	0.247788	0.48018	3.70968	0.0310465	0.150307	0.145775
FSW	no challenge	T24 post-priming/ T0 challenge	T1	0.294239	0.385942	0.141593	0.35045	4.85215	0.112791	0.187117	0.13169
FSW	no challenge	T24 post-priming/ T0 challenge	T1	0.177778	0.149867	0.331858	0.413514	6.66667	0.366279	0.16411	0.397887
FSW	no challenge	T24 post-priming/ T0 challenge	T1	0.35144	0.0374005	0.0574336	0.53964	7.01613	0.377907	0.280675	0.195423
PIC	no challenge	T24 post-priming/ T0 challenge	T1	76.6537	7.6	1.3415	28.4741	52.8926	0.653846	0.464832	9.72222
PIC	no challenge	T24 post-priming/ T0 challenge	T1	111.284	66.2222	1.40136	28.0654	119.008	1.32168	0.675841	3.59444
PIC	no challenge	T24 post-priming/ T0 challenge	T1	108.949	7.91111	1.53741	20.2997	8.59504	0.437762	0.868502	3.21111
PIC	no challenge	T24 post-priming/ T0 challenge	T1	53.6965	56	1.15238	16.3488	67.7686	0.401399	0.461774	3.03889
PIC	no challenge	T24 post-priming/ T0 challenge	T1	130.739	79.1111	1.87755	31.4714	124.793	0.567133	0.648318	9.27778
PIC	no challenge	T24 post-priming/ T0 challenge	T1	116.732	38.7556	1.09252	25.7493	125.413	0.199301	0.318043	3.46667
PIC	no challenge	T24 post-priming/ T0 challenge	T1	75.8755	51.5556	1.4966	12.03	6.88017	0.648951	0.749235	1.41111
PIC	no challenge	T24 post-priming/ T0 challenge	T1	126.848	6.88889	0.62585	22.6158	34.9174	0.343357	0.321101	4.14444
PIC	no challenge	T24 post-priming/ T0 challenge	T1	239.3	7.6	1.68707	44.0054	117.769	0.656643	0.455657	13.6667
PIC	no challenge	T24 post-priming/ T0 challenge	T1	129.572	5.73333	0.673469	15.8038	21.6942	0.107692	0.587156	7.77778
PIC	no challenge	T24 post-priming/ T0 challenge	T1	5.11688	0.093956	0.948077	19.3519	23.2727	0.33274	0.248773	5.95238
PIC	no challenge	T24 post-priming/ T0 challenge	T1	7.42857	0.818681	0.990385	19.0741	52.3636	0.672598	0.361702	2.20068
PIC	no challenge	T24 post-priming/ T0 challenge	T1	7.27273	0.0978022	1.08654	13.7963	3.78182	0.222776	0.464812	1.96599
PIC	no challenge	T24 post-priming/ T0 challenge	T1	3.58442	0.692308	0.814423	11.1111	29.8182	0.20427	0.247136	1.86054
PIC	no challenge	T24 post-priming/ T0 challenge	T1	8.72727	0.978022	1.32692	21.3889	54.9091	0.288612	0.346972	5.68027
PIC	no challenge	T24 post-priming/ T0 challenge	T1	7.79221	0.479121	0.772115	17.5	55.1818	0.101423	0.170213	2.12245
PIC	no challenge	T24 post-priming/ T0 challenge	T1	5.06494	0.637363	1.05769	8.17593	3.02727	0.330249	0.400982	0.863946
PIC	no challenge	T24 post-priming/ T0 challenge	T1	8.46753	0.0851648	0.442308	15.3704	15.3636	0.174733	0.171849	2.53741
PIC	no challenge	T24 post-priming/ T0 challenge	T1	15.974	0.093956	1.19231	29.9074	51.8182	0.334164	0.243863	8.36735
PIC	no challenge	T24 post-priming/ T0 challenge	T1	8.64935	0.0708791	0.475962	10.7407	9.54545	0.0548043	0.314239	4.7619
PIC	no challenge	T24 post-priming/ T0 challenge	T1	5.47222	1.03012	0.714493	17.7119	23.4862	0.426941	0.2432	6.31769
PIC	no challenge	T24 post-priming/ T0 challenge	T1	7.94444	8.9759	0.746377	17.4576	52.844	0.863014	0.3536	2.33574
PIC	no challenge	T24 post-priming/ T0 challenge	T1	7.77778	1.07229	0.818841	12.6271	3.81651	0.285845	0.4544	2.08664
PIC	no challenge	T24 post-priming/ T0 challenge	T1	3.83333	7.59036	0.613768	10.1695	30.0917	0.2621	0.2416	1.97473
PIC	no challenge	T24 post-priming/ T0 challenge	T1	9.33333	10.7229	1	19.5763	55.4128	0.37032	0.3392	6.02888
PIC	no challenge	T24 post-priming/ T0 challenge	T1	8.33333	5.25301	0.581884	16.0169	55.6881	0.130137	0.1664	2.25271
PIC	no challenge	T24 post-priming/ T0 challenge	T1	5.41667	6.98795	0.797101	7.48305	3.05505	0.423744	0.392	0.916968
PIC	no challenge	T24 post-priming/ T0 challenge	T1	9.05556	0.933735	0.333333	14.0678	15.5046	0.224201	0.168	2.69314
PIC	no challenge	T24 post-priming/ T0 challenge	T1	17.0833	1.03012	0.898551	27.3729	52.2936	0.428767	0.2384	8.88087
PIC	no challenge	T24 post-priming/ T0 challenge	T1	9.25	0.777108	0.358696	9.83051	9.63303	0.0703196	0.3072	5.05415
PIC	no challenge	T24 post-priming/ T0 challenge	T1	11.7262	0.18057	0.752672	33.6013	59.9532	0.644828	0.186962	3.42466
PIC	no challenge	T24 post-priming/ T0 challenge	T1	17.0238	1.57339	0.78626	33.119	134.895	1.30345	0.271833	1.26614
PIC	no challenge	T24 post-priming/ T0 challenge	T1	16.6667	0.187962	0.862595	23.955	9.74239	0.431724	0.349323	1.13112
PIC	no challenge	T24 post-priming/ T0 challenge	T1	8.21429	1.33052	0.646565	19.2926	76.815	0.395862	0.185732	1.07045
PIC	no challenge	T24 post-priming/ T0 challenge	T1	20	1.87962	1.05344	37.1383	141.452	0.55931	0.260763	3.2681
PIC	no challenge	T24 post-priming/ T0 challenge	T1	17.8571	0.920803	0.612977	30.3859	142.155	0.196552	0.127921	1.22114
PIC	no challenge	T24 post-priming/ T0 challenge	T1	11.6071	1.22492	0.839695	14.1961	7.79859	0.64	0.301353	0.497065
PIC	no challenge	T24 post-priming/ T0 challenge	T1	19.4048	0.163675	0.351145	26.6881	39.5785	0.338621	0.129151	1.45988
PIC	no challenge	T24 post-priming/ T0 challenge	T1	36.6071	0.18057	0.946565	51.9293	133.489	0.647586	0.183272	4.81409
PIC	no challenge	T24 post-priming/ T0 challenge	T1	19.8214	0.13622	0.377863	18.6495	24.5902	0.106207	0.236162	2.73973
PIC	no challenge	T24 post-priming/ T0 challenge	T1	3.49291	0.0846535	0.872566	15.3676	29.2571	0.297771	0.240506	3.10835
PIC	no challenge	T24 post-priming/ T0 challenge	T1	5.07092	0.737624	0.911504	15.1471	65.8286	0.601911	0.349684	1.1492
PIC	no challenge	T24 post-priming/ T0 challenge	T1	4.96454	0.0881188	1	10.9559	4.75429	0.199363	0.449367	1.02664
PIC	no challenge	T24 post-priming/ T0 challenge	T1	2.44681	0.623762	0.749558	8.82353	37.4857	0.182803	0.238924	0.971581
PIC	no challenge	T24 post-priming/ T0 challenge	T1	5.95745	0.881188	1.22124	16.9853	69.0286	0.25828	0.335443	2.96625
PIC	no challenge	T24 post-priming/ T0 challenge	T1	5.31915	0.431683	0.710619	13.8971	69.3714	0.0907643	0.164557	1.10835
PIC	no challenge	T24 post-priming/ T0 challenge	T1	3.45745	0.574257	0.973451	6.49265	3.80571	0.295541	0.387658	0.451155
PIC	no challenge	T24 post-priming/ T0 challenge	T1	5.78014	0.0767327	0.40708	12.2059	19.3143	0.156369	0.166139	1.32504
PIC	no challenge	T24 post-priming/ T0 challenge	T1	10.9043	0.0846535	1.09735	23.75	65.1429	0.299045	0.235759	4.36945
PIC	no challenge	T24 post-priming/ T0 challenge	T1	5.90426	0.0638614	0.438053	8.52941	12	0.0490446	0.303797	2.48668
PIC	no challenge	T24 post-priming/ T0 challenge	T1	9.07834	0.231394	0.939048	8.46154	47.4954	0.486979	0.15735	4.56919
PIC	no challenge	T24 post-priming/ T0 challenge	T1	13.1797	2.01624	0.980952	8.34008	106.865	0.984375	0.228778	1.6893
PIC	no challenge	T24 post-priming/ T0 challenge	T1	12.9032	0.240866	1.07619	6.03239	7.718	0.326042	0.293996	1.50914
PIC	no challenge	T24 post-priming/ T0 challenge	T1	6.35945	1.70501	0.806667	4.8583	60.8534	0.298958	0.156315	1.4282
PIC	no challenge	T24 post-priming/ T0 challenge	T1	15.4839	2.40866	1.31429	9.35223	112.059	0.422396	0.219462	4.36031
PIC	no challenge	T24 post-priming/ T0 challenge	T1	13.8249	1.17997	0.764762	7.65182	112.616	0.148438	0.10766	1.62924
PIC	no challenge	T24 post-priming/ T0 challenge	T1	8.98618	1.56969	1.04762	3.5749	6.17811	0.483333	0.253623	0.663185
PIC	no challenge	T24 post-priming/ T0 challenge	T1	15.023	0.209743	0.438095	6.72065	31.3544	0.255729	0.108696	1.94778
PIC	no challenge	T24 post-priming/ T0 challenge	T1	28.341	0.231394	1.18095	13.0769	105.751	0.489062	0.154244	6.42298
PIC	no challenge	T24 post-priming/ T0 challenge	T1	15.3456	0.17456	0.471429	4.69636	19.4805	0.0802083	0.198758	3.65535
PIC	no challenge	T24 post-priming/ T0 challenge	T1	9.75248	0.314917	1.14518	4.8046	71.1111	0.644828	0.1216	5.43478
PIC	no challenge	T24 post-priming/ T0 challenge	T1	14.1584	2.74401	1.19628	4.73563	160	1.30345	0.1768	2.00932
PIC	no challenge	T24 post-priming/ T0 challenge	T1	13.8614	0.327808	1.31243	3.42529	11.5556	0.431724	0.2272	1.79503
PIC	no challenge	T24 post-priming/ T0 challenge	T1	6.83168	2.32044	0.98374	2.75862	91.1111	0.395862	0.1208	1.69876
PIC	no challenge	T24 post-priming/ T0 challenge	T1	16.6337	3.27808	1.60279	5.31034	167.778	0.55931	0.1696	5.18634
PIC	no challenge	T24 post-priming/ T0 challenge	T1	14.8515	1.60589	0.932636	4.34483	168.611	0.196552	0.0832	1.93789
PIC	no challenge	T24 post-priming/ T0 challenge	T1	9.65347	2.13628	1.27758	2.02989	9.25	0.64	0.196	0.78882
PIC	no challenge	T24 post-priming/ T0 challenge	T1	16.1386	0.285451	0.534262	3.81609	46.9444	0.338621	0.084	2.31677
PIC	no challenge	T24 post-priming/ T0 challenge	T1	30.4455	0.314917	1.44019	7.42529	158.333	0.647586	0.1192	7.63975
PIC	no challenge	T24 post-priming/ T0 challenge	T1	16.4851	0.237569	0.574913	2.66667	29.1667	0.106207	0.1536	4.34783
PIC	no challenge	T24 post-priming/ T0 challenge	T1	26.6576	0.24359	1.0456	103.465	34.8774	0.566667	0.182912	14.9573
PIC	no challenge	T24 post-priming/ T0 challenge	T1	38.7009	2.12251	1.09226	101.98	78.4741	1.14545	0.265945	5.52991
PIC	no challenge	T24 post-priming/ T0 challenge	T1	37.889	0.253561	1.1983	73.7624	5.66757	0.379394	0.341757	4.94017
PIC	no challenge	T24 post-priming/ T0 challenge	T1	18.6739	1.79487	0.898197	59.4059	44.6866	0.347879	0.181709	4.67521
PIC	no challenge	T24 post-priming/ T0 challenge	T1	45.4668	2.53561	1.46341	114.356	82.2888	0.491515	0.255114	14.2735
PIC	no challenge	T24 post-priming/ T0 challenge	T1	40.5954	1.24217	0.851538	93.5644	82.6975	0.172727	0.12515	5.33333
PIC	no challenge	T24 post-priming/ T0 challenge	T1	26.387	1.65242	1.16649	43.7129	4.53678	0.562424	0.294826	2.17094
PIC	no challenge	T24 post-priming/ T0 challenge	T1	44.1137	0.220798	0.487805	82.1782	23.0245	0.297576	0.126354	6.37607
PIC	no challenge	T24 post-priming/ T0 challenge	T1	83.2206	0.24359	1.31495	159.901	77.6567	0.569091	0.179302	21.0256
PIC	no challenge	T24 post-priming/ T0 challenge	T1	45.0609	0.183761	0.52492	57.4257	14.3052	0.0933333	0.231047	11.9658
PIC	no challenge	T24 post-priming/ T0 challenge	T1	31.2698	0.484419	0.60122	0	84.2105	0.591772	0.336283	19.0424
PIC	no challenge	T24 post-priming/ T0 challenge	T1	45.3968	4.22096	0.628049	0	189.474	1.1962	0.488938	7.04026
PIC	no challenge	T24 post-priming/ T0 challenge	T1	44.4444	0.504249	0.689024	0	13.6842	0.396203	0.628319	6.28945
PIC	no challenge	T24 post-priming/ T0 challenge	T1	21.9048	3.56941	0.516463	0	107.895	0.363291	0.334071	5.95212
PIC	no challenge	T24 post-priming/ T0 challenge	T1	53.3333	5.04249	0.841463	0	198.684	0.513291	0.469027	18.1719
PIC	no challenge	T24 post-priming/ T0 challenge	T1	47.619	2.47025	0.489634	0	199.671	0.18038	0.230088	6.78999
PIC	no challenge	T24 post-priming/ T0 challenge	T1	30.9524	3.28612	0.670732	0	10.9539	0.587342	0.542035	2.76387
PIC	no challenge	T24 post-priming/ T0 challenge	T1	51.746	0.439093	0.280488	0	55.5921	0.310759	0.232301	8.11752
PIC	no challenge	T24 post-priming/ T0 challenge	T1	97.619	0.484419	0.756098	0	187.5	0.594304	0.329646	26.7682
PIC	no challenge	T24 post-priming/ T0 challenge	T1	52.8571	0.365439	0.301829	0	34.5395	0.0974684	0.424779	15.2339
PIC	no challenge	T24 post-priming/ T0 challenge	T1	8.107	0.22679	0.872566	18.8288	34.4086	0.543605	0.233129	6.16197
PIC	no challenge	T24 post-priming/ T0 challenge	T1	11.7695	1.97613	0.911504	18.5586	77.4194	1.09884	0.338957	2.27817
PIC	no challenge	T24 post-priming/ T0 challenge	T1	11.5226	0.236074	1	13.4234	5.5914	0.363953	0.435583	2.03521
PIC	no challenge	T24 post-priming/ T0 challenge	T1	5.67901	1.67109	0.749558	10.8108	44.086	0.333721	0.231595	1.92606
PIC	no challenge	T24 post-priming/ T0 challenge	T1	13.8272	2.36074	1.22124	20.8108	81.1828	0.471512	0.325153	5.88028
PIC	no challenge	T24 post-priming/ T0 challenge	T1	12.3457	1.1565	0.710619	17.027	81.586	0.165698	0.159509	2.19718
PIC	no challenge	T24 post-priming/ T0 challenge	T1	8.02469	1.53846	0.973451	7.95495	4.47581	0.539535	0.375767	0.894366
PIC	no challenge	T24 post-priming/ T0 challenge	T1	13.4156	0.20557	0.40708	14.955	22.7151	0.285465	0.161043	2.62676
PIC	no challenge	T24 post-priming/ T0 challenge	T1	25.3086	0.22679	1.09735	29.0991	76.6129	0.54593	0.228528	8.66197
PIC	no challenge	T24 post-priming/ T0 challenge	T1	13.7037	0.171088	0.438053	10.4505	14.1129	0.0895349	0.294479	4.92958
