# Supplementary material for: Antiviral protection in the Pacific oyster Crassostrea (Magallana) gigas against OsHV-1 infection using UV-inactivated virus
Source: Frontiers journal article supplement (doi:10.3389/fmars.2024.1378511), 2024-04-23
Supplement: Table_3.XLSX [file Table_3.XLSX]

## Sheet: qPCR data
sampling				Cp
Exposition	Challenge	Timing	time point	mean Cp reference genes (EF1a-RPL40)	ORF80	ORF87	ORF99
no treatment	no challenge	T0 before priming	T0	18.9132	35	35	35
no treatment	no challenge	T0 before priming	T0	18.4172	35	35	35
no treatment	no challenge	T0 before priming	T0	18.2747	35	35	35
no treatment	no challenge	T0 before priming	T0	19.2555	35	35	35
no treatment	no challenge	T0 before priming	T0	18.4126	35	35	35
no treatment	no challenge	T0 before priming	T0	19.3029	35	35	35
no treatment	no challenge	T0 before priming	T0	18.779	35	35	35
no treatment	no challenge	T0 before priming	T0	18.6953	35	35	35
no treatment	no challenge	T0 before priming	T0	19.3563	35	35	35
no treatment	no challenge	T0 before priming	T0	18.1628	35	35	35
virus UV	no challenge	T24 post-priming/ T0 challenge	T1	19.0999	35	31.85	29.4617
virus UV	no challenge	T24 post-priming/ T0 challenge	T1	18.971	35	32.06	30.062
virus UV	no challenge	T24 post-priming/ T0 challenge	T1	19.489	35	35	35
virus UV	no challenge	T24 post-priming/ T0 challenge	T1	19.11	35	35	30.3834
virus UV	no challenge	T24 post-priming/ T0 challenge	T1	19.0352	35	31.81	32.5628
virus UV	no challenge	T24 post-priming/ T0 challenge	T1	18.9927	35	31.2691	29.8751
virus UV	no challenge	T24 post-priming/ T0 challenge	T1	18.5064	35	31.94	30.5453
virus UV	no challenge	T24 post-priming/ T0 challenge	T1	19.0476	35	32.5183	30.574
virus UV	no challenge	T24 post-priming/ T0 challenge	T1	18.9725	35	35	35
virus UV	no challenge	T24 post-priming/ T0 challenge	T1	18.592	35	35	35
free virus UV	no challenge	T24 post-priming/ T0 challenge	T1	19.2719	35	35	35
free virus UV	no challenge	T24 post-priming/ T0 challenge	T1	18.9464	35	35	35
free virus UV	no challenge	T24 post-priming/ T0 challenge	T1	18.9167	35	35	35
free virus UV	no challenge	T24 post-priming/ T0 challenge	T1	18.8972	35	35	35
free virus UV	no challenge	T24 post-priming/ T0 challenge	T1	19.5141	35	35	35
free virus UV	no challenge	T24 post-priming/ T0 challenge	T1	19.3259	35	35	35
free virus UV	no challenge	T24 post-priming/ T0 challenge	T1	19.2171	35	35	35
free virus UV	no challenge	T24 post-priming/ T0 challenge	T1	19.239	35	35	35
free virus UV	no challenge	T24 post-priming/ T0 challenge	T1	19.5696	35	35	35
free virus UV	no challenge	T24 post-priming/ T0 challenge	T1	19.1085	35	35	35
FSW	no challenge	T24 post-priming/ T0 challenge	T1	19.2212	35	35	35
FSW	no challenge	T24 post-priming/ T0 challenge	T1	19.2531	35	35	35
FSW	no challenge	T24 post-priming/ T0 challenge	T1	19.4341	35	35	35
FSW	no challenge	T24 post-priming/ T0 challenge	T1	19.3103	35	35	35
FSW	no challenge	T24 post-priming/ T0 challenge	T1	18.8967	35	35	35
FSW	no challenge	T24 post-priming/ T0 challenge	T1	19.3593	35	35	35
FSW	no challenge	T24 post-priming/ T0 challenge	T1	19.389	35	35	35
FSW	no challenge	T24 post-priming/ T0 challenge	T1	18.8464	35	35	35
FSW	no challenge	T24 post-priming/ T0 challenge	T1	19.7152	35	35	35
FSW	no challenge	T24 post-priming/ T0 challenge	T1	19.4887	35	35	35
PIC	no challenge	T24 post-priming/ T0 challenge	T1	18.9941	35	35	35
PIC	no challenge	T24 post-priming/ T0 challenge	T1	19.4289	35	35	35
PIC	no challenge	T24 post-priming/ T0 challenge	T1	19.2421	35	35	35
PIC	no challenge	T24 post-priming/ T0 challenge	T1	19.5388	35	35	35
PIC	no challenge	T24 post-priming/ T0 challenge	T1	18.9654	35	35	35
PIC	no challenge	T24 post-priming/ T0 challenge	T1	18.855	35	35	35
PIC	no challenge	T24 post-priming/ T0 challenge	T1	19.9222	35	35	35
PIC	no challenge	T24 post-priming/ T0 challenge	T1	19.209	35	35	35
PIC	no challenge	T24 post-priming/ T0 challenge	T1	18.7708	35	35	35
PIC	no challenge	T24 post-priming/ T0 challenge	T1	19.2822	35	35	35
virus UV	SW	48h post-infection	T3	19.3764	35	35	35
virus UV	SW	48h post-infection	T3	19.3236	35	35	35
virus UV	SW	48h post-infection	T3	19.3479	35	35	32.3927
virus UV	SW	48h post-infection	T3	19.4118	35	35	35
virus UV	SW	48h post-infection	T3	20.68	35	35	35
virus UV	SW	48h post-infection	T3	20.0926	35	35	35
virus UV	SW	48h post-infection	T3	19.8018	35	35	35
virus UV	SW	48h post-infection	T3	19.2125	35	35	35
virus UV	SW	48h post-infection	T3	19.1897	35	35	35
virus UV	SW	48h post-infection	T3	19.3056	35	35	35
free virus UV	SW	48h post-infection	T3	19.7067	35	35	35
free virus UV	SW	48h post-infection	T3	19.6186	35	35	35
free virus UV	SW	48h post-infection	T3	19.3803	35	35	35
free virus UV	SW	48h post-infection	T3	19.5253	35	35	35
free virus UV	SW	48h post-infection	T3	19.489	35	35	35
free virus UV	SW	48h post-infection	T3	19.2806	35	35	35
free virus UV	SW	48h post-infection	T3	19.2779	35	35	35
free virus UV	SW	48h post-infection	T3	19.2149	35	35	35
free virus UV	SW	48h post-infection	T3	19.516	35	35	35
free virus UV	SW	48h post-infection	T3	20.222	35	35	35
FSW	SW	48h post-infection	T3	19.315	35	35	35
FSW	SW	48h post-infection	T3	19.6077	35	35	35
FSW	SW	48h post-infection	T3	19.6183	35	35	35
FSW	SW	48h post-infection	T3	19.4421	35	35	35
FSW	SW	48h post-infection	T3	19.2785	35	35	35
FSW	SW	48h post-infection	T3	18.9893	35	35	35
FSW	SW	48h post-infection	T3	19.6939	35	35	35
FSW	SW	48h post-infection	T3	19.2137	35	35	35
FSW	SW	48h post-infection	T3	19.6271	35	35	35
FSW	SW	48h post-infection	T3	20.0367	35	35	35
PIC	SW	48h post-infection	T3	19.1273	35	35	35
PIC	SW	48h post-infection	T3	19.3539	35	35	35
PIC	SW	48h post-infection	T3	19.0503	35	35	35
PIC	SW	48h post-infection	T3	18.9909	35	35	35
PIC	SW	48h post-infection	T3	19.2307	35	35	35
PIC	SW	48h post-infection	T3	19.0062	35	35	35
PIC	SW	48h post-infection	T3	18.7212	35	35	35
PIC	SW	48h post-infection	T3	19.4448	35	35	35
PIC	SW	48h post-infection	T3	18.8167	35	35	35
PIC	SW	48h post-infection	T3	19.3351	35	35	35
virus UV	CSW	48h post-infection	T3	19.4513	30.8124	32.6963	35
virus UV	CSW	48h post-infection	T3	19.679	35	35	35
virus UV	CSW	48h post-infection	T3	19.3477	32.2152	35	35
virus UV	CSW	48h post-infection	T3	19.2543	31.5705	35	31.8879
virus UV	CSW	48h post-infection	T3	19.4505	35	35	35
virus UV	CSW	48h post-infection	T3	19.8905	31.6285	32.8987	32.6067
virus UV	CSW	48h post-infection	T3	20.6799	35	35	35
virus UV	CSW	48h post-infection	T3	19.4394	35	35	35
virus UV	CSW	48h post-infection	T3	19.6819	20.056	23.2282	21.1765
virus UV	CSW	48h post-infection	T3	19.4076	28.3605	32.1659	29.3137
free virus UV	CSW	48h post-infection	T3	19.51	31.4703	32.8163	35
free virus UV	CSW	48h post-infection	T3	19.8994	21.0789	24.2653	22.9136
free virus UV	CSW	48h post-infection	T3	19.4589	19.6768	23.1403	21.8197
free virus UV	CSW	48h post-infection	T3	19.6381	19.6946	23.6607	22.0066
free virus UV	CSW	48h post-infection	T3	19.3385	20.922	24.2531	23.1233
free virus UV	CSW	48h post-infection	T3	19.4415	35	32.0322	32.6087
free virus UV	CSW	48h post-infection	T3	19.6472	21.6209	25.2426	23.2767
free virus UV	CSW	48h post-infection	T3	19.5777	32.3287	32.7734	33.7143
free virus UV	CSW	48h post-infection	T3	20.8024	21.8057	25.6006	23.6148
free virus UV	CSW	48h post-infection	T3	18.9934	26.0806	29.552	27.2869
FSW	CSW	48h post-infection	T3	19.9368	19.6896	23.4539	21.9045
FSW	CSW	48h post-infection	T3	19.4274	21.2745	24.1604	22.5716
FSW	CSW	48h post-infection	T3	19.7418	30.322	32.2162	32.0511
FSW	CSW	48h post-infection	T3	19.2943	32.3874	35	35
FSW	CSW	48h post-infection	T3	19.4059	32.2615	32.296	32.4198
FSW	CSW	48h post-infection	T3	19.4372	31.1636	35	35
FSW	CSW	48h post-infection	T3	19.7875	19.8902	23.2623	21.5626
FSW	CSW	48h post-infection	T3	19.3646	19.1389	22.6856	20.9244
FSW	CSW	48h post-infection	T3	19.6448	22.0763	24.6702	23.2637
FSW	CSW	48h post-infection	T3	19.3519	19.818	22.8478	21.5275
PIC	CSW	48h post-infection	T3	19.4435	31.5156	35	31.5274
PIC	CSW	48h post-infection	T3	20.0305	35	35	35
PIC	CSW	48h post-infection	T3	18.784	35	32.474	35
PIC	CSW	48h post-infection	T3	19.6106	35	35	35
PIC	CSW	48h post-infection	T3	19.0417	32.366	35	35
PIC	CSW	48h post-infection	T3	19.2299	35	33.2162	35
PIC	CSW	48h post-infection	T3	19.2644	35	35	35
PIC	CSW	48h post-infection	T3	19.0724	35	35	35
PIC	CSW	48h post-infection	T3	18.9723	35	35	35
PIC	CSW	48h post-infection	T3	18.5998	32.2294	35	35

## Sheet: FC calculation
Sampling				ΔCt			FC
Exposition	Challenge	Timing	time point	ORF87	ORF88	ORF99	ORF87	ORF88	ORF99
virus UV	no challenge	T24 post-priming/ T0 challenge	T1	15.9001	12.7501	10.3617	6.28927	7.84308	9.65088
virus UV	no challenge	T24 post-priming/ T0 challenge	T1	16.029	13.089	11.0909	6.23871	7.64002	9.01637
virus UV	no challenge	T24 post-priming/ T0 challenge	T1	15.511	15.511	15.511	6.44702	6.44702	6.44702
virus UV	no challenge	T24 post-priming/ T0 challenge	T1	15.89	15.89	11.2734	6.29327	6.29327	8.87046
virus UV	no challenge	T24 post-priming/ T0 challenge	T1	15.9648	12.7748	13.5276	6.26378	7.82791	7.3923
virus UV	no challenge	T24 post-priming/ T0 challenge	T1	16.0073	12.2764	10.8823	6.24715	8.1457	9.18919
virus UV	no challenge	T24 post-priming/ T0 challenge	T1	16.4936	13.4336	12.0389	6.06296	7.44402	8.3064
virus UV	no challenge	T24 post-priming/ T0 challenge	T1	15.9524	13.4707	11.5264	6.26866	7.42354	8.67576
virus UV	no challenge	T24 post-priming/ T0 challenge	T1	16.0275	16.0275	16.0275	6.23928	6.23928	6.23928
virus UV	no challenge	T24 post-priming/ T0 challenge	T1	16.408	16.408	16.408	6.0946	6.0946	6.0946
free virus UV	no challenge	T24 post-priming/ T0 challenge	T1	15.7281	15.7281	15.7281	6.35805	6.35805	6.35805
free virus UV	no challenge	T24 post-priming/ T0 challenge	T1	16.0536	16.0536	16.0536	6.22913	6.22913	6.22913
free virus UV	no challenge	T24 post-priming/ T0 challenge	T1	16.0833	16.0833	16.0833	6.21761	6.21761	6.21761
free virus UV	no challenge	T24 post-priming/ T0 challenge	T1	16.1028	16.1028	16.1028	6.21009	6.21009	6.21009
free virus UV	no challenge	T24 post-priming/ T0 challenge	T1	15.4859	15.4859	15.4859	6.45748	6.45748	6.45748
free virus UV	no challenge	T24 post-priming/ T0 challenge	T1	15.6741	15.6741	15.6741	6.37997	6.37997	6.37997
free virus UV	no challenge	T24 post-priming/ T0 challenge	T1	15.7829	15.7829	15.7829	6.33598	6.33598	6.33598
free virus UV	no challenge	T24 post-priming/ T0 challenge	T1	15.761	15.761	15.761	6.34476	6.34476	6.34476
free virus UV	no challenge	T24 post-priming/ T0 challenge	T1	15.4304	15.4304	15.4304	6.48072	6.48072	6.48072
free virus UV	no challenge	T24 post-priming/ T0 challenge	T1	15.8915	15.8915	15.8915	6.29266	6.29266	6.29266
FSW	no challenge	T24 post-priming/ T0 challenge	T1	15.7788	15.7788	15.7788	6.33762	6.33762	6.33762
FSW	no challenge	T24 post-priming/ T0 challenge	T1	15.7469	15.7469	15.7469	6.35047	6.35047	6.35047
FSW	no challenge	T24 post-priming/ T0 challenge	T1	15.5659	15.5659	15.5659	6.4243	6.4243	6.4243
FSW	no challenge	T24 post-priming/ T0 challenge	T1	15.6897	15.6897	15.6897	6.37363	6.37363	6.37363
FSW	no challenge	T24 post-priming/ T0 challenge	T1	16.1033	16.1033	16.1033	6.20989	6.20989	6.20989
FSW	no challenge	T24 post-priming/ T0 challenge	T1	15.6407	15.6407	15.6407	6.39357	6.39357	6.39357
FSW	no challenge	T24 post-priming/ T0 challenge	T1	15.611	15.611	15.611	6.40574	6.40574	6.40574
FSW	no challenge	T24 post-priming/ T0 challenge	T1	16.1536	16.1536	16.1536	6.19059	6.19059	6.19059
FSW	no challenge	T24 post-priming/ T0 challenge	T1	15.2848	15.2848	15.2848	6.54243	6.54243	6.54243
FSW	no challenge	T24 post-priming/ T0 challenge	T1	15.5113	15.5113	15.5113	6.4469	6.4469	6.4469
PIC	no challenge	T24 post-priming/ T0 challenge	T1	16.0059	16.0059	16.0059	6.24768	6.24768	6.24768
PIC	no challenge	T24 post-priming/ T0 challenge	T1	15.5711	15.5711	15.5711	6.42216	6.42216	6.42216
PIC	no challenge	T24 post-priming/ T0 challenge	T1	15.7579	15.7579	15.7579	6.34602	6.34602	6.34602
PIC	no challenge	T24 post-priming/ T0 challenge	T1	15.4612	15.4612	15.4612	6.46779	6.46779	6.46779
PIC	no challenge	T24 post-priming/ T0 challenge	T1	16.0346	16.0346	16.0346	6.23652	6.23652	6.23652
PIC	no challenge	T24 post-priming/ T0 challenge	T1	16.145	16.145	16.145	6.19387	6.19387	6.19387
PIC	no challenge	T24 post-priming/ T0 challenge	T1	15.0778	15.0778	15.0778	6.63225	6.63225	6.63225
PIC	no challenge	T24 post-priming/ T0 challenge	T1	15.791	15.791	15.791	6.33272	6.33272	6.33272
PIC	no challenge	T24 post-priming/ T0 challenge	T1	16.2292	16.2292	16.2292	6.16175	6.16175	6.16175
PIC	no challenge	T24 post-priming/ T0 challenge	T1	15.7178	15.7178	15.7178	6.3622	6.3622	6.3622
virus UV	SW	48h post-infection	T3	15.6236	15.6236	15.6236	6.40058	6.40058	6.40058
virus UV	SW	48h post-infection	T3	15.6764	15.6764	15.6764	6.37903	6.37903	6.37903
virus UV	SW	48h post-infection	T3	15.6521	15.6521	13.0447	6.38893	6.38893	7.66592
virus UV	SW	48h post-infection	T3	15.5882	15.5882	15.5882	6.41513	6.41513	6.41513
virus UV	SW	48h post-infection	T3	14.32	14.32	14.32	6.98326	6.98326	6.98326
virus UV	SW	48h post-infection	T3	14.9074	14.9074	14.9074	6.70807	6.70807	6.70807
virus UV	SW	48h post-infection	T3	15.1982	15.1982	15.1982	6.57974	6.57974	6.57974
virus UV	SW	48h post-infection	T3	15.7875	15.7875	15.7875	6.33413	6.33413	6.33413
virus UV	SW	48h post-infection	T3	15.8103	15.8103	15.8103	6.32498	6.32498	6.32498
virus UV	SW	48h post-infection	T3	15.6944	15.6944	15.6944	6.37172	6.37172	6.37172
free virus UV	SW	48h post-infection	T3	15.2933	15.2933	15.2933	6.53881	6.53881	6.53881
free virus UV	SW	48h post-infection	T3	15.3814	15.3814	15.3814	6.50138	6.50138	6.50138
free virus UV	SW	48h post-infection	T3	15.6197	15.6197	15.6197	6.40216	6.40216	6.40216
free virus UV	SW	48h post-infection	T3	15.4747	15.4747	15.4747	6.46215	6.46215	6.46215
free virus UV	SW	48h post-infection	T3	15.511	15.511	15.511	6.44703	6.44703	6.44703
free virus UV	SW	48h post-infection	T3	15.7194	15.7194	15.7194	6.36155	6.36155	6.36155
free virus UV	SW	48h post-infection	T3	15.7221	15.7221	15.7221	6.36049	6.36049	6.36049
free virus UV	SW	48h post-infection	T3	15.7851	15.7851	15.7851	6.33511	6.33511	6.33511
free virus UV	SW	48h post-infection	T3	15.484	15.484	15.484	6.45829	6.45829	6.45829
free virus UV	SW	48h post-infection	T3	14.778	14.778	14.778	6.76682	6.76682	6.76682
FSW	SW	48h post-infection	T3	15.685	15.685	15.685	6.3755	6.3755	6.3755
FSW	SW	48h post-infection	T3	15.3923	15.3923	15.3923	6.49676	6.49676	6.49676
FSW	SW	48h post-infection	T3	15.3817	15.3817	15.3817	6.50125	6.50125	6.50125
FSW	SW	48h post-infection	T3	15.5579	15.5579	15.5579	6.42761	6.42761	6.42761
FSW	SW	48h post-infection	T3	15.7215	15.7215	15.7215	6.3607	6.3607	6.3607
FSW	SW	48h post-infection	T3	16.0107	16.0107	16.0107	6.24583	6.24583	6.24583
FSW	SW	48h post-infection	T3	15.3061	15.3061	15.3061	6.53333	6.53333	6.53333
FSW	SW	48h post-infection	T3	15.7863	15.7863	15.7863	6.3346	6.3346	6.3346
FSW	SW	48h post-infection	T3	15.3729	15.3729	15.3729	6.50494	6.50494	6.50494
FSW	SW	48h post-infection	T3	14.9633	14.9633	14.9633	6.68304	6.68304	6.68304
PIC	SW	48h post-infection	T3	15.8727	15.8727	15.8727	6.30014	6.30014	6.30014
PIC	SW	48h post-infection	T3	15.6461	15.6461	15.6461	6.39137	6.39137	6.39137
PIC	SW	48h post-infection	T3	15.9497	15.9497	15.9497	6.26972	6.26972	6.26972
PIC	SW	48h post-infection	T3	16.0091	16.0091	16.0091	6.24644	6.24644	6.24644
PIC	SW	48h post-infection	T3	15.7693	15.7693	15.7693	6.34143	6.34143	6.34143
PIC	SW	48h post-infection	T3	15.9938	15.9938	15.9938	6.25244	6.25244	6.25244
PIC	SW	48h post-infection	T3	16.2788	16.2788	16.2788	6.14294	6.14294	6.14294
PIC	SW	48h post-infection	T3	15.5552	15.5552	15.5552	6.42872	6.42872	6.42872
PIC	SW	48h post-infection	T3	16.1833	16.1833	16.1833	6.17923	6.17923	6.17923
PIC	SW	48h post-infection	T3	15.6649	15.6649	15.6649	6.38371	6.38371	6.38371
virus UV	CSW	48h post-infection	T3	11.3612	13.245	15.5487	8.80192	7.55001	6.4314
virus UV	CSW	48h post-infection	T3	15.321	15.321	15.321	6.52697	6.52697	6.52697
virus UV	CSW	48h post-infection	T3	12.8675	15.6523	15.6523	7.7715	6.38884	6.38884
virus UV	CSW	48h post-infection	T3	12.3162	15.7457	12.6335	8.11939	6.35096	7.91545
virus UV	CSW	48h post-infection	T3	15.5495	15.5495	15.5495	6.43107	6.43107	6.43107
virus UV	CSW	48h post-infection	T3	11.738	13.0082	12.7161	8.51936	7.68749	7.86402
virus UV	CSW	48h post-infection	T3	14.3201	14.3201	14.3201	6.98321	6.98321	6.98321
virus UV	CSW	48h post-infection	T3	15.5606	15.5606	15.5606	6.42647	6.42647	6.42647
virus UV	CSW	48h post-infection	T3	0.374118	3.54632	1.49463	267.295	28.1983	66.9062
virus UV	CSW	48h post-infection	T3	8.95289	12.7583	9.90608	11.1696	7.83803	10.0948
free virus UV	CSW	48h post-infection	T3	11.9603	13.3063	15.49	8.36098	7.51524	6.45577
free virus UV	CSW	48h post-infection	T3	1.17942	4.36584	3.01419	84.7873	22.9051	33.1764
free virus UV	CSW	48h post-infection	T3	0.21786	3.68137	2.3608	459.011	27.1638	42.3585
free virus UV	CSW	48h post-infection	T3	0.0565255	4.02261	2.36851	1769.11	24.8595	42.2206
free virus UV	CSW	48h post-infection	T3	1.5835	4.91456	3.78477	63.1514	20.3477	26.4217
free virus UV	CSW	48h post-infection	T3	15.5585	12.5906	13.1672	6.42737	7.94241	7.59463
free virus UV	CSW	48h post-infection	T3	1.9737	5.59542	3.62954	50.6663	17.8718	27.5517
free virus UV	CSW	48h post-infection	T3	12.751	13.1957	14.1366	7.84254	7.57823	7.07384
free virus UV	CSW	48h post-infection	T3	1.00327	4.79823	2.81239	99.6742	20.841	35.557
free virus UV	CSW	48h post-infection	T3	7.08719	10.5586	8.29354	14.11	9.47095	12.0576
FSW	CSW	48h post-infection	T3	0.247223	3.517	1.96762	404.494	28.4333	50.8229
FSW	CSW	48h post-infection	T3	1.84715	4.73304	3.14419	54.1375	21.1281	31.8047
FSW	CSW	48h post-infection	T3	10.5802	12.4744	12.3093	9.45159	8.01641	8.12395
FSW	CSW	48h post-infection	T3	13.0931	15.7057	15.7057	7.63761	6.36713	6.36713
FSW	CSW	48h post-infection	T3	12.8556	12.8902	13.014	7.77871	7.75785	7.68406
FSW	CSW	48h post-infection	T3	11.7263	15.5628	15.5628	8.5278	6.42558	6.42558
FSW	CSW	48h post-infection	T3	0.102614	3.47474	1.77507	974.523	28.7791	56.3357
FSW	CSW	48h post-infection	T3	0.225732	3.32099	1.55974	443.003	30.1115	64.1133
FSW	CSW	48h post-infection	T3	2.43142	5.0254	3.61889	41.1283	19.8989	27.6328
FSW	CSW	48h post-infection	T3	0.466162	3.4959	2.17567	214.518	28.605	45.9629
PIC	CSW	48h post-infection	T3	12.0721	15.5565	12.0839	8.28356	6.42819	8.27547
PIC	CSW	48h post-infection	T3	14.9695	14.9695	14.9695	6.68025	6.68025	6.68025
PIC	CSW	48h post-infection	T3	16.216	13.69	16.216	6.16676	7.3046	6.16676
PIC	CSW	48h post-infection	T3	15.3894	15.3894	15.3894	6.49796	6.49796	6.49796
PIC	CSW	48h post-infection	T3	13.3243	15.9583	15.9583	7.50506	6.26633	6.26633
PIC	CSW	48h post-infection	T3	15.7701	13.9863	15.7701	6.3411	7.14983	6.3411
PIC	CSW	48h post-infection	T3	15.7356	15.7356	15.7356	6.355	6.355	6.355
PIC	CSW	48h post-infection	T3	15.9276	15.9276	15.9276	6.27842	6.27842	6.27842
PIC	CSW	48h post-infection	T3	16.0277	16.0277	16.0277	6.23921	6.23921	6.23921
PIC	CSW	48h post-infection	T3	13.6296	16.4002	16.4002	7.33697	6.09749	6.09749
